# Supplementary material for: A VH1-69 antibody lineage from an infected Chinese donor potently neutralizes HIV-1 by targeting the V3 glycan supersite
Source: PubMed Central journal article supplement — Sci Adv. 2020 Sep 16;6(38):eabb1328. doi: 10.1126/sciadv.abb1328 (PMC7494343; doi:10.1126/sciadv.abb1328), 2020-09-16
Supplement: abb1328_SM.pdf [file abb1328_SM.pdf]

## Supplementary Materials for

### **A V<sub>H</sub>1-69 antibody lineage from an infected Chinese donor potently neutralizes HIV-1 by targeting the V3 glycan supersite**

Sonu Kumar, Bin Ju, Benjamin Shapero, Xiaohe Lin, Li Ren, Lei Zhang, Dan Li, Zehua Zhou, Yi Feng, Cindy Sou, Colin J. Mann, Yanling Hao, Anita Sarkar, Jiali Hou, Christian Nunnally, Kunxue Hong, Shuo Wang, Xiangyang Ge, Bin Su, Elise Landais, Devin Sok, Michael B. Zwick, Linling He, Jiang Zhu\*, Ian A. Wilson\*, Yiming Shao\*

\*Corresponding author. Email: jiang@scripps.edu (J.Z.); wilson@scripps.edu (I.A.W.); yshao@bjmu.edu.cn (Y.S.)

Published 16 September 2020, *Sci. Adv.* **6**, eabb1328 (2020)

DOI: 10.1126/sciadv.abb1328

#### **This PDF file includes:**

Tables S1 to S3

Figs. S1 to S8

**Table S1A. Neutralizing breadth and potency of sera from an HIV-1-infected Chinese donor (CBJC438) on the global panel of HIV-Env strains. <sup>a</sup>**

| Global Panel   |      |             | CBJC438    |            |            |            |            |            |            |
|----------------|------|-------------|------------|------------|------------|------------|------------|------------|------------|
| Clade          | Tier | Pseudovirus | 2005-07-12 | 2006-04-06 | 2007-04-10 | 2008-03-20 | 2009-06-13 | 2009-12-15 | 2012-07-31 |
| A              | 2    | 398-F1      | 1277       | 893        | 102        | 829        | 1575       | 2038       | 254        |
|                | 2    | TRO.11      | 260        | 348        | 54         | 358        | 334        | 492        | 122        |
| B              | 2    | X2278       | 737        | 601        | 111        | 670        | 703        | 879        | 161        |
|                | 2    | 25710       | 498        | 294        | 72         | 323        | 308        | 241        | 129        |
| C              | 2    | Ce0217      | 408        | 427        | 51         | 331        | 236        | 378        | 102        |
|                | 2    | Ce1176      | 341        | 303        | 25         | 496        | 318        | 385        | 126        |
| G              | 2    | X1632       | 101        | 91         | 23         | 214        | 116        | 138        | 91         |
| CRF01_AE       | 2    | CNE55       | 114        | 93         | 31         | 138        | 63         | 77         | 82         |
|                | 2    | CNE8        | 143        | 94         | 75         | 191        | 75         | 151        | 125        |
| CRF07_BC       | 2    | BJOX2000    | 414        | 400        | 22         | 248        | 298        | 621        | 150        |
|                | 2    | CH119       | 208        | 207        | 46         | 217        | 304        | 533        | 135        |
| AC             | 2    | 246         | 162        | 150        | 81         | 253        | 205        | 224        | 138        |
| Potency (GMTs) |      |             | 292        | 253        | 50         | 311        | 258        | 352        | 129        |
| Breadth% (>20) |      |             | 100        | 100        | 100        | 100        | 100        | 100        | 100        |

<sup>a</sup>Global panel was developed by the Montefiori group at Duke University Medical Center.  
The serum dilution values >1000 are highlighted in red, 200~1000 in orange, and 20~200 in green.

**Table S1B. Neutralizing breadth and potency of monoclonal antibodies (mAbs) from an HIV-1-infected Chinese donor (CBJC438) on the global panel of HIV-Env strains. <sup>a</sup>**

| Global Panel        |      |             | mAbs    |        |        |         |       |
|---------------------|------|-------------|---------|--------|--------|---------|-------|
| Clade               | Tier | Pseudovirus | 438-B11 | 438-D5 | 438-D6 | 438-F11 | VRC01 |
| A                   | 2    | 398-F1      | 0.02    | 0.03   | >50    | >50     | 0.41  |
| B                   | 2    | TRO.11      | 0.07    | 0.14   | >50    | >50     | 0.77  |
|                     | 2    | X2278       | 0.09    | 0.08   | >50    | >50     | 0.35  |
| C                   | 2    | 25710       | 0.64    | 0.55   | >50    | >50     | 0.87  |
|                     | 2    | Ce0217      | 4.53    | 1.67   | >50    | >50     | 0.42  |
|                     | 2    | Ce1176      | 0.34    | 0.33   | >50    | >50     | 4.88  |
| G                   | 2    | X1632       | >50     | >50    | >50    | >50     | 0.31  |
| CRF01_AE            | 2    | CNE55       | >50     | >50    | >50    | >50     | 0.64  |
|                     | 2    | CNE8        | >50     | >50    | >50    | >50     | 0.56  |
| CRF07_BC            | 2    | BJOX2000    | 0.06    | 0.07   | >50    | >50     | >50   |
|                     | 2    | CH119       | 0.14    | 0.22   | >50    | >50     | 1.56  |
| AC                  | 2    | 246         | >50     | >50    | >50    | >50     | 0.51  |
| Potency (GMTs)      |      |             | 0.18    | 0.19   | n/a    | n/a     | 0.69  |
| Breadth% (<50µg/ml) |      |             | 67      | 67     | 0      | 0       | 92    |

<sup>a</sup>Global panel was developed by the Montefiori group at Duke University Medical Center.

The neutralizing potency of the mAbs was measured as IC<sub>50</sub> in µg/ml. Values < 0.2 µg/ml are highlighted in red, 0.2~2 µg/ml in yellow, and 2~50 µg/ml in green.



|    |                   |       |       |       |       |       |       |
|----|-------------------|-------|-------|-------|-------|-------|-------|
| AG | 928.28            | >10.0 | >10.0 | >10.0 | >10.0 | >10.0 | >10.0 |
| AG | T211.9            | >10.0 | 2.920 | 0.029 | >10.0 | >10.0 | 0.114 |
| AG | T235.47           | 0.014 | 0.062 | >10.0 | 0.056 | 0.248 | >10.0 |
| AG | T250.4            | >10.0 | 0.001 | 0.001 | >10.0 | 0.005 | 0.005 |
| AG | T251.18           | >10.0 | >10.0 | 5.689 | >10.0 | >10.0 | >10.0 |
| AG | T255.34           | >10.0 | >10.0 | >10.0 | >10.0 | >10.0 | >10.0 |
| AG | T257.31           | >10.0 | >10.0 | >10.0 | >10.0 | >10.0 | >10.0 |
| AG | T263.8            | >10.0 | 3.310 | 0.133 | >10.0 | >10.0 | 0.533 |
| B  | 89.6              | 0.024 | 0.009 | 0.002 | 0.098 | 0.036 | 0.009 |
| B  | 6535.3            | 0.011 | 0.003 | 0.003 | 0.043 | 0.011 | 0.013 |
| B  | 1006.11.C3.1601   | 0.018 | 0.002 | 0.005 | 0.074 | 0.007 | 0.021 |
| B  | 1012.11.TC21.3257 | 0.314 | 0.012 | 0.006 | 1.255 | 0.049 | 0.022 |
| B  | 1054.07.TC4.1499  | 0.488 | 0.081 | 0.018 | 1.952 | 0.324 | 0.073 |
| B  | 1056.10.TA11.1826 | >10.0 | 0.035 | 0.003 | >10.0 | 0.140 | 0.010 |
| B  | 62357.14.D3.4589  | >10.0 | 9.600 | 0.326 | >10.0 | >10.0 | 1.305 |
| B  | 6240.08.TA5.4622  | 0.028 | 0.028 | 0.012 | 0.111 | 0.112 | 0.048 |
| B  | 6244.13.B5.4567   | 0.043 | 0.072 | 0.014 | 0.174 | 0.290 | 0.058 |
| B  | 92BR020           | 0.010 | 0.011 | 0.004 | 0.040 | 0.045 | 0.018 |
| B  | AC10.0.29         | 0.014 | 0.042 | 0.003 | 0.058 | 0.168 | 0.013 |
| B  | ADA               | 0.019 | 0.014 | 0.013 | 0.078 | 0.055 | 0.052 |
| B  | BaL.26            | 0.026 | 0.017 | 0.026 | 0.104 | 0.069 | 0.104 |
| B  | CAAN5342.A2       | 0.025 | 0.010 | 0.031 | 0.099 | 0.039 | 0.122 |
| B  | DH12              | 0.036 | 0.002 | 0.006 | 0.142 | 0.006 | 0.025 |
| B  | HxB2              | >10.0 | >10.0 | >10.0 | >10.0 | >10.0 | >10.0 |
| B  | JRCSF             | 0.034 | 0.063 | 0.006 | 0.137 | 0.253 | 0.022 |
| B  | JRFL              | 0.056 | 0.088 | 0.011 | 0.223 | 0.352 | 0.044 |
| B  | MN                | >10.0 | >10.0 | >10.0 | >10.0 | >10.0 | >10.0 |
| B  | PVO.4             | 4.419 | 0.126 | 0.004 | >10.0 | 0.504 | 0.014 |
| B  | QHO692.42         | >10.0 | 6.984 | 0.021 | >10.0 | >10.0 | 0.083 |
| B  | REJO.67           | >10.0 | >10.0 | >10.0 | >10.0 | >10.0 | >10.0 |
| B  | RHPA4.7           | 0.051 | 0.020 | 0.016 | 0.203 | 0.080 | 0.064 |
| B  | SC05.8C11.2344    | 0.014 | 0.022 | 0.007 | 0.058 | 0.087 | 0.027 |
| B  | SC422661.8        | 0.016 | 0.059 | 0.121 | 0.065 | 0.237 | 0.485 |
| B  | SF162             | 0.008 | 0.003 | 0.002 | 0.030 | 0.013 | 0.010 |
| B  | SS1196.1          | 0.009 | 0.004 | 0.004 | 0.038 | 0.016 | 0.015 |
| B  | TRJO.58           | >10.0 | 9.008 | 0.011 | >10.0 | >10.0 | 0.043 |
| B  | TRO.11            | 0.023 | 0.008 | 0.006 | 0.092 | 0.032 | 0.023 |
| B  | WEAU.d15.410.787  | 0.026 | 0.026 | 0.005 | 0.104 | 0.102 | 0.022 |
| B  | WITO.33           | >10.0 | 0.653 | >10.0 | >10.0 | 2.611 | >10.0 |
| B  | YU2               | 0.047 | 0.089 | 0.035 | 0.190 | 0.356 | 0.139 |

|    |                    |       |          |          |       |       |       |
|----|--------------------|-------|----------|----------|-------|-------|-------|
| BC | CNE17              | >10.0 | 4.341    | 0.051    | >10.0 | >10.0 | 0.206 |
| BC | CNE19              | >10.0 | 0.012    | >10.0    | >10.0 | 0.050 | >10.0 |
| BC | CNE20              | >10.0 | 4.89E-04 | 3.98E-04 | >10.0 | 0.002 | 0.002 |
| BC | CNE21              | 6.052 | 0.007    | 0.005    | >10.0 | 0.027 | 0.018 |
| BC | CNE30              | 1.196 | 0.049    | 0.245    | 4.782 | 0.197 | 0.981 |
| BC | CNE52              | >10.0 | 4.939    | >10.0    | >10.0 | >10.0 | >10.0 |
| BC | CNE53              | 0.020 | 0.010    | 0.009    | 0.082 | 0.040 | 0.035 |
| BC | CNE58              | >10.0 | >10.0    | 0.977    | >10.0 | >10.0 | 3.909 |
| C  | 1394C9G1(Rev.)     | >10.0 | 0.457    | 0.007    | >10.0 | 1.828 | 0.026 |
| C  | 7030102001E5(Rev.) | 0.012 | 0.007    | 0.004    | 0.047 | 0.028 | 0.015 |
| C  | 93IN905            | 0.009 | 0.003    | 0.004    | 0.036 | 0.010 | 0.016 |
| C  | BF1266.431a        | >10.0 | >10.0    | >10.0    | >10.0 | >10.0 | >10.0 |
| C  | CAP210.2.00.E8     | >10.0 | >10.0    | >10.0    | >10.0 | >10.0 | >10.0 |
| C  | CAP45.2.00.G3      | >10.0 | 8.529    | >10.0    | >10.0 | >10.0 | >10.0 |
| C  | Ce0393 C3          | >10.0 | >10.0    | >10.0    | >10.0 | >10.0 | >10.0 |
| C  | Ce1172 H1          | 2.686 | 0.004    | 0.015    | >10.0 | 0.015 | 0.059 |
| C  | Ce1176 A3          | 0.038 | 0.015    | 0.009    | 0.154 | 0.061 | 0.035 |
| C  | Ce2010 F5          | >10.0 | >10.0    | >10.0    | >10.0 | >10.0 | >10.0 |
| C  | Ce2060 G9          | >10.0 | >10.0    | >10.0    | >10.0 | >10.0 | >10.0 |
| C  | Ce703010054 2A2    | >10.0 | >10.0    | >10.0    | >10.0 | >10.0 | >10.0 |
| C  | Ce704809221 1B3    | >10.0 | 0.031    | 0.013    | >10.0 | 0.123 | 0.052 |
| C  | Du156.12           | 0.016 | 0.006    | 0.010    | 0.065 | 0.024 | 0.039 |
| C  | Du172.17           | 0.898 | 0.021    | 0.014    | 3.593 | 0.082 | 0.055 |
| C  | Du422.1            | 0.061 | 0.038    | 0.032    | 0.245 | 0.151 | 0.130 |
| C  | HIV-0013095.2.11   | 5.028 | 0.057    | >10.0    | >10.0 | 0.227 | >10.0 |
| C  | HIV-001428.2.42    | 6.188 | 0.018    | 0.024    | >10.0 | 0.074 | 0.097 |
| C  | HIV-16055.2.3      | >10.0 | 0.626    | >10.0    | >10.0 | 2.502 | >10.0 |
| C  | IAVIC22            | 0.008 | 0.001    | 0.003    | 0.033 | 0.006 | 0.010 |
| C  | ZM109F.PB4         | >10.0 | >10.0    | >10.0    | >10.0 | >10.0 | >10.0 |
| C  | ZM135M.PL10a       | >10.0 | 1.260    | 7.496    | >10.0 | 5.041 | >10.0 |
| C  | ZM197M.PB7         | >10.0 | >10.0    | >10.0    | >10.0 | >10.0 | >10.0 |
| C  | ZM214M.PL15        | >10.0 | 0.475    | 0.768    | >10.0 | 1.898 | 3.071 |
| C  | ZM233M.PB6         | >10.0 | 4.532    | >10.0    | >10.0 | >10.0 | >10.0 |
| C  | ZM246F.D5          | >10.0 | 0.067    | 0.004    | >10.0 | 0.268 | 0.014 |
| C  | ZM247F.F7          | >10.0 | 0.028    | 0.016    | >10.0 | 0.112 | 0.065 |
| C  | ZM249M.B10         | >10.0 | >10.0    | 1.238    | >10.0 | >10.0 | 4.950 |
| C  | ZM249M.PL1         | >10.0 | >10.0    | 1.235    | >10.0 | >10.0 | 4.941 |
| C  | ZM53M.PB12         | >10.0 | 0.003    | >10.0    | >10.0 | 0.011 | >10.0 |
| CD | 3817.v2.c59        | >10.0 | >10.0    | 0.007    | >10.0 | >10.0 | 0.030 |
| CD | 6480.v4.c25        | 0.006 | 0.005    | >10.0    | 0.025 | 0.021 | >10.0 |

|    |                |       |       |       |       |       |       |
|----|----------------|-------|-------|-------|-------|-------|-------|
| CD | 6811.v7.c18    | 0.012 | 0.002 | 0.013 | 0.048 | 0.008 | 0.054 |
| CD | 6952.v1.c20    | >10.0 | 0.040 | >10.0 | >10.0 | 0.161 | >10.0 |
| CD | 89.F1 2 25     | >10.0 | >10.0 | >10.0 | >10.0 | >10.0 | >10.0 |
| D  | 231965.c01     | >10.0 | >10.0 | >10.0 | >10.0 | >10.0 | >10.0 |
| D  | 3016.v5.c45    | >10.0 | >10.0 | >10.0 | >10.0 | >10.0 | >10.0 |
| D  | A07412M1.vrc12 | >10.0 | 0.032 | 6.744 | >10.0 | 0.127 | >10.0 |
| G  | P0402 c2 11    | 0.316 | 0.004 | 0.006 | 1.263 | 0.015 | 0.026 |
| G  | P1981 C5 3     | 0.006 | 0.001 | 0.011 | 0.024 | 0.005 | 0.043 |
| G  | X1193 c1       | >10.0 | 0.033 | 0.010 | >10.0 | 0.132 | 0.041 |
| G  | X1254 c3       | 0.090 | 0.039 | 0.015 | 0.360 | 0.156 | 0.062 |
| G  | X1632 S2 B10   | >10.0 | >10.0 | >10.0 | >10.0 | >10.0 | >10.0 |
| G  | X2088 c9       | 0.015 | 0.005 | 7.559 | 0.059 | 0.020 | >10.0 |
| G  | X2131 C1 B5    | >10.0 | 0.010 | 0.009 | >10.0 | 0.040 | 0.037 |
| -  | aMLV           | >10.0 | >10.0 | >10.0 | >10.0 | >10.0 | >10.0 |
| -  | VSV            | >10.0 | >10.0 | >10.0 | >10.0 | >10.0 | >10.0 |

The neutralizing potency of the mAbs was measured as IC50/ IC80 in µg/ml. Values < 0.1 µg/ml are highlighted in red, 0.1-1 µg/ml in orange, 1-5 µg/ml in yellow, and 5-10 µg/ml in green.

|                                                            | IC <sub>50</sub> (µg/ml)                          |        |        | IC <sub>80</sub> (µg/ml) |        |        |      |
|------------------------------------------------------------|---------------------------------------------------|--------|--------|--------------------------|--------|--------|------|
|                                                            | 438-B11                                           | PGT121 | PGT128 | 438-B11                  | PGT121 | PGT128 |      |
| Total Number of Viruses Tested                             | 129                                               | 129    | 129    | 129                      | 129    | 129    |      |
| Total Number of Viruses Neutralized                        | IC <sub>50</sub> / IC <sub>80</sub> >10.0 (µg/ml) | 54     | 81     | 88                       | 48     | 71     | 82   |
|                                                            | IC <sub>50</sub> / IC <sub>80</sub> >1.0 (µg/ml)  | 46     | 70     | 79                       | 41     | 66     | 74   |
|                                                            | IC <sub>50</sub> / IC <sub>80</sub> >0.1 (µg/ml)  | 41     | 64     | 69                       | 25     | 38     | 57   |
| Percent of Viruses Neutralized                             | IC <sub>50</sub> / IC <sub>80</sub> >10.0 (µg/ml) | 41.9   | 62.8   | 68.2                     | 37.2   | 55.0   | 63.6 |
|                                                            | IC <sub>50</sub> / IC <sub>80</sub> >1.0 (µg/ml)  | 35.7   | 54.3   | 61.2                     | 31.8   | 51.2   | 57.4 |
|                                                            | IC <sub>50</sub> / IC <sub>80</sub> >0.1 (µg/ml)  | 31.8   | 49.6   | 53.5                     | 19.4   | 29.5   | 44.2 |
| Median IC <sub>50</sub> / IC <sub>80</sub> (µg/ml)         | 0.027                                             | 0.028  | 0.013  | 0.098                    | 0.080  | 0.046  |      |
| Geometric IC <sub>50</sub> / IC <sub>80</sub> Mean (µg/ml) | 0.058                                             | 0.037  | 0.024  | 0.136                    | 0.072  | 0.065  |      |

| Antibody ID | Geometric IC <sub>50</sub> Mean |           |           |                      |
|-------------|---------------------------------|-----------|-----------|----------------------|
|             | Subtype A                       | Subtype B | Subtype C | Subtypes A, B, and C |
| 438-B11     | 0.079                           | 0.035     | 0.138     | 0.056                |
| PGT121      | 0.045                           | 0.039     | 0.049     | 0.043                |
| PGT128      | 0.054                           | 0.010     | 0.031     | 0.019                |

**Table S1D. Characterization of four monoclonal antibodies isolated from an HIV-1-infected Chinese donor (CBJC438).**

| mAbs    | Heavy chain |         |      |           |               | Light chain          |                   |           |               |
|---------|-------------|---------|------|-----------|---------------|----------------------|-------------------|-----------|---------------|
|         | IGHV        | IGHD    | IGHJ | CDR3 (aa) | SHM (%)       | IGκ/λ V              | IGκ/λ J           | CDR3 (aa) | SHM (%)       |
| 438-B11 | 1-69*01     | 3-3*01  | 3*01 | 21        | 25.4 (73/288) | 3-20*01 <sup>a</sup> | 3*01 <sup>a</sup> | 9         | 12.7 (34/267) |
| 438-D5  | 1-69*01     | 3-3*01  | 3*01 | 21        | 24.7 (71/288) | 3-20*01 <sup>a</sup> | 3*01 <sup>a</sup> | 9         | 13.5 (36/267) |
| 438-D6  | 3-48*02     | 1-20*01 | 4*02 | 8         | 8.7 (25/288)  | 2-11*01 <sup>b</sup> | 3*02 <sup>b</sup> | 10        | 2.6 (7/270)   |
| 438-F11 | 7-4-1*02    | 2-21*02 | 6*04 | 20        | 10.1 (29/288) | 1-40*01 <sup>b</sup> | 2*01 <sup>b</sup> | 11        | 7.8 (21/270)  |

<sup>a</sup>438-B11 and 438-D5 use Kappa chains.

<sup>b</sup>438-D6 and 438-F11 use Lambda chains.



**Table S1E. Next-generation sequencing and antibodyomics pipeline processing of CBJC438 B -cell repertoires. <sup>a</sup>**

| Time point | N <sub>Raw</sub> | N <sub>Assign</sub> | Chain | N <sub>Chain</sub> | <Length> (nt) | N <sub>Usable</sub> | Perc <sub>Usable</sub> (%) |
|------------|------------------|---------------------|-------|--------------------|---------------|---------------------|----------------------------|
| 2005       | 4,755,711        | 3,727,420           | H     | 1,509,712          | 597.5         | 1,022,678           | 67.7%                      |
|            |                  |                     | κ     | 1,106,927          | 600.5         | 617,666             | 55.8%                      |
|            |                  |                     | λ     | 1,110,781          | 605.8         | 704,904             | 63.5%                      |
| 2008       | 5,138,283        | 4,148,887           | H     | 1,864,778          | 583.9         | 1,261,262           | 67.6%                      |
|            |                  |                     | κ     | 1,135,577          | 567.7         | 672,894             | 59.3%                      |
|            |                  |                     | λ     | 1,148,532          | 591.6         | 714,059             | 62.2%                      |
| 2012       | 4,802,280        | 3,991,951           | H     | 1,954,169          | 579.0         | 1,404,745           | 71.9%                      |
|            |                  |                     | κ     | 1,016,963          | 591.0         | 647,514             | 63.7%                      |
|            |                  |                     | λ     | 1,020,819          | 595.6         | 675,578             | 66.2%                      |

<sup>a</sup> Listed items include the time point, total number of raw reads (N<sub>Raw</sub>), number of reads with assigned germline V genes using a cutoff E-value of 10<sup>-3</sup> (N<sub>Assign</sub>), antibody chain type (Chain: H, κ, and λ), number of antibody chains (N<sub>Chain</sub>), average read length (<length>), number of antibody chains after pipeline processing and removing sequences with a V-gene alignment of 250 bp or shorter (N<sub>Usable</sub>), and percentage of the usable reads (Perc<sub>Usable</sub>=N<sub>Usable</sub>/N<sub>Chain</sub>×100). 5'-RACE PCR was used in library preparation. After template preparation on Ion Chef, the pooled antibody chain libraries were sequenced on Ion GeneStudio S5.

**Table S2A. Expression of antibodies with selected 2005 heavy chain variants paired with the 438-D5 light chain.**

| No.             | Chain type | Sequence index | Yield (mg/L culture sup) | Neutralization (%) | Sequence identity (%) | Amino acid sequence of variable domain                                                                                                 |
|-----------------|------------|----------------|--------------------------|--------------------|-----------------------|----------------------------------------------------------------------------------------------------------------------------------------|
| 1 <sup>a</sup>  | H          | 656611         | 2.4                      | 36                 | 81.3                  | QVGLLQSGAEVKEPGSSVTVSCKPSGGTFTNYAISWVRQAPGQGRSSSEGGRRVPIISGISKYAEQFQGRVRLYEDDSTKTVYLDLRLSLTSDDTGVYYCARWRGCLDCHYDTGAYYNDASDIWGQTMVTVSA  |
| 2 <sup>a</sup>  | H          | 3252240        | 0.8                      | 14                 | 81.5                  | QVRLVQSGGAEVKKPGSSVTVSCKPSGGTFTFRNYAITGVRQAPGQGLQWMMGGVPIIGGISKYAEQFQGRVRLYEDDSTKTVYLDLRLSLTSDDTGVYYCARWRGCLDCHYDTGAYYNDASDIWGQTMVTVSA |
| 3 <sup>a</sup>  | H          | 4088606        | 1.0                      | 42                 | 77.9                  | QVRLVQSGAEVKEPGSSVTVSCKPSGGTFTNYAMHWVRQAPGQGLQWMMGGVPIIGVYKYAEQFQGRVRLYEDDSTKTVYLDLRLSLTSDDTGVYYCARWRGCLDCHYDTGAYYNDASDIWGQTMVTVSA     |
| 4 <sup>a</sup>  | H          | 2771371        | 1.0                      | 17                 | 81.8                  | RWRLVQSGAEVKEPGSSVTVSCKPFWRHLHQLHWYLPVPPGWRTRRRSGDGGRRVPIIGVYKYAEQFQGRVRLYEDDSTKTVYLDLRLSLTSDDTGVYYCARWRGCLDCHYDTGAYYNDASDIWGQTMVTVSA  |
| 5 <sup>a</sup>  | H          | 4071948_dN     | 0.7                      | 33                 | 80.3                  | VAGLLQVVAEVRKPGSSVTVSCKPSGGTFTNYAMHWVRQAPGQGLQWMMGGVPIIGVYKYAEQFQGRVRLYEDDSTKTVYLDLRLSLTSDDTGVYYCARWRGCLDCHYDTGAYYNDASDIWGQTMVTVSA     |
| 6 <sup>b</sup>  | H          | 1018124        | 1.5                      | 0                  | 66.9                  | QVQLVQSGAEVKKPGSSVTVSCKPSGGTFTNYAMHWVRQAPGQGLQWMMGGIIPLLGITDYAQKQGRVTTITADDSTSTAYMDLSSLTSEDVAVYYCARAAPPDLRGIYVAYNYMDVWGKTTVTVSS        |
| 7 <sup>b</sup>  | H          | 2859064        | 2.0                      | 0                  | 66.9                  | EVHLVQSGAEVKKPGSSVTVSCKPSGGTFTNYAMHWVRQAPGQGLQWMMGGIIPLLGITDYAQKQGRVTTITADDSTSTAYMDLSSLTSEDVAVYYCARAAPPDLRGIYVAYNYMDVWGKTTVTVSS        |
| 8 <sup>b</sup>  | H          | 3069562        | —                        | n/a                | 66.4                  | RVQLVQSGAEVKKPGSSVTVSCKPSGGTFTNYAMHWVRQAPGQGLQWMMGGIIPLLGITDYAQKQGRVTTITADDSTSTAYMDLSSLTSEDVAVYYCARAAPPDLRGIYVAYNYMDVWGKTTVTVSS        |
| 9 <sup>b</sup>  | H          | 2438418        | —                        | n/a                | 66.4                  | RWQLVQSGAEVKKPGSSVTVSCKPSGGTFTNYAMHWVRQAPGQGLQWMMGGIIPSLAITDYAQKQGRVTTITADDSTSTAYMDLSSLTSEDVAVYYCARAAPPDLRGIYVAYNYMDVWGKTTVTVSS        |
| 10 <sup>b</sup> | H          | 3749771        | —                        | n/a                | 65.1                  | QVSRGCELVQVVAEVRKPGSSVTVSCKPSGGTFTNYAMHWVRQAPGQGLQWMMGGIIPLLGITDYAQKQGRVTTITADDSTSTAYMDLSSLTSEDVAVYYCARAAPPDLRGIYVAYNYMDVWGKTTVTVSS    |

Listed items include sequence number, antibody chain type, sequence index in the PGM data set, protein yield, neutralization, sequence identity to 438-B11 heavy chain determined during the pipeline processing, and amino acid sequence. No expression (—) denotes protein yield less than 0.5 mg/L. Neutralizing activity was tested against viruses on Global Panel. n/a, not available.

<sup>a</sup> Heavy chains are related to 438-D5/B11 but cover a wide range of sequence identity and HCDR3 motifs.

<sup>b</sup> All sequences have a similar HCDR3 loop length of 20-23 aa.

**Table S2B. Expression of antibodies with selected 2005 light chain variants paired with the 438-D5 heavy chain.**

| No.            | Chain type | Sequence index | Yield (mg/L culture sup) | Neutralization (%) | Sequence identity (%) | Amino acid sequence of variable domain                                                                      |
|----------------|------------|----------------|--------------------------|--------------------|-----------------------|-------------------------------------------------------------------------------------------------------------|
| 1 <sup>a</sup> | K          | 1020383        | 8.3                      | 67                 | 89.2                  | EIVLTQSPGTLSSSGERGLTSCRASNISAYLAWYQQKRGQTPRLLIYAASSRATATPDRFSGSGSGTDFTLTINRLEPEDFAVYYCQHYGGSFFSFGPGTQVDVK   |
| 2 <sup>a</sup> | K          | 1031879        | —                        | n/a                | 88.3                  | EIVLTQSPGTLSSSGERGLTSCRASNISAYLAWYQQKRGQTPRLLIYAASSRATATPDRFSGSGSGTDFTLTINRLEPEGFVAVYYCQHYGGSFFSFGPGTQVDVF  |
| 3 <sup>a</sup> | K          | 158500         | 6.5                      | 67                 | 88.9                  | KIVLTQSPGTLSSSGERGLTSCRASNISAYLAWYQQKRGQTPRLLIYAASSRATATPDRFSGSGSGTDFTLTINRLEPEDFAVYYCQHYGGSFFSFGPGTQVDVK   |
| 4 <sup>a</sup> | K          | 1965944        | 7.2                      | 67                 | 88.6                  | KLIVLTQSPGTLSSSGERGLTSCRASHNISAYLAWYQQKRGQTPRLLIYAASSRATATPDRFSGSGSGTDFTLTINRLEPEDFAVYYCQHYGGSFFSFGPGTQVDVK |
| 5 <sup>a</sup> | K          | 1043810        | —                        | n/a                | 89.5                  | EIVLTQSPGTLSSSGERGLTSCRASNISAYLAWYQQKRGQTPRLLIYAASSRATATPDRFSGSGSGTDFTLTINRLEPEGFVAVYYCQHYGGSFFSFGPGTQVDVF  |

Listed items include sequence number, antibody chain type, sequence index in the PGM data set, protein yield, neutralization, sequence identity to 438-B11 light chain determined during the pipeline processing, and amino acid sequence. No expression (—) denotes protein yield less than 0.5 mg/L. Neutralizing activity was tested against viruses on Global Panel. n/a, not available.

<sup>a</sup> Kappa chains are related to 438-D5/B11 but cover a wide range of sequence identity and KCDR3 motifs.

**Table S2C. Expression of antibodies with selected 2008 heavy chain variants paired with the 438-D5 light chain.**

| No.             | Chain type | Sequence index | Yield (mg/L culture sup) | Neutralization (%) | Sequence identity (%) | Amino acid sequence of variable domain                                                                                                  |
|-----------------|------------|----------------|--------------------------|--------------------|-----------------------|-----------------------------------------------------------------------------------------------------------------------------------------|
| 1 <sup>a</sup>  | H          | 1066709        | 30.2                     | 67                 | 97.7                  | QVRLQSGAEVKKPGSSVTISCKPVGDTFTNFAIHWVRQAPGGQLEWVGGRRVPPVGIYKYGKFKQDRRLRYEDDPMKTVFLELRSLTSDDTGVVYCTRWRGCGMCPYDTSYNDASDVWGPQTKVIVSA        |
| 2 <sup>a</sup>  | H          | 2437629        | —                        | n/a                | 97.2                  | QVRLQSGAEWTKPGSSVDNAPCKPVGDTFTNFAIHWVRQAPGGQLEWVGGRRVPPVGIYKYGKFKFHDRRLRYEDDPMKTVFLELRSLTSDDTGVVYCTRWRGCGMCPYDTSYNDASDVWGPQTKVIVSA      |
| 3 <sup>a</sup>  | H          | 3954697        | —                        | n/a                | 93.8                  | QVRLLRSGAEVKKPGSSVSIKCPVGGTFTNFAITWVQAPGGQLEWVGGRRVPPVGIYKYGKFKQDRRLRYEDDPMKTVFLELRSLTSDGTGVVYCTRWRGCGMCPYDTSYNDASDVWGPQTKVIVSA         |
| 4 <sup>a</sup>  | H          | 1067269        | 6.5                      | 67                 | 81.5                  | QVRLVQSGAVVKKPGSSVTISCKPVGDTFTNFAIHWVRQAPGGQLEWVGGRRVPPVGIYKYGKFKQDRMLWEDDPAKTVFLDLRSLTPDDTGVVYCARWRGCGDCLYDTAAYNDASDIWGGQTMVIVSA       |
| 5 <sup>a</sup>  | H          | 3795269        | —                        | n/a                | 80.8                  | QVRLQSGAVVKKPGSSVTISCKPVGDTFTNFAIHWVRQAPGGQLEWVGGRRVPPVGIYKYGKFKQDRMLWEDDPAKTVFLDLRSLTPDDTGVVYCARWRGCGDCLYDTAAYNDASDIWGGQTMVIVSA        |
| 6 <sup>a</sup>  | H          | 4500127        | —                        | n/a                | 81.3                  | QVRLQSGAVVKKPGSSVTISCKPVGDTFTNFAIHWVRQAPGGQLEWVGGRRVPPVGIYKYGKFKQDRMLWEDDPAKTVFLDLRSLTPDDTGVVYCARWRGCGDCLYDTAAYNDASDIWGGQTMVIVSA        |
| 7 <sup>a</sup>  | H          | 881629         | —                        | n/a                | 80.3                  | QVRLVQSGAVVKKPGSSVTISCKPVGDTFTNFAISWVRQAPGGQLEWVGGRRVPPVGIYKYGKFKQDRMLWEDDPAKTVFLDLRSLTPDDTGVVYCARWRGCGDCLYDTAAYNDASDIWGGQTMVIVSA       |
| 8 <sup>a</sup>  | H          | 1021217        | 4.7                      | 75                 | 82.1                  | QVRLQSGAEVKKPGSSVRSCKPLGGFTFNHAIHWVRQAPGGQLEWVGGRRVPPVGIYKYGKFKQDRMLWEDDPAKTVFLDLRSLTSDDTGVVYCTRWRGCGDCLYDTAAYNDASDIWGGQTMVIVSA         |
| 9 <sup>a</sup>  | H          | 1071291        | —                        | n/a                | 81.5                  | QVRLQSGAEVKKPGSSVRSCKPLGGFTFNHAIHWVRQAPGGQLEWVGGRRVPPVGIYKYGKFKQDRMLWEDDPAKTVFLDLRSLTSDDTGVVYCTRWRGCGDCLYDTAAYNDASDIWGGQTMVIVSA         |
| 10 <sup>a</sup> | H          | 2032465        | —                        | n/a                | 81.8                  | QVRLQSGAEVKKPGSSVRSCKPLGGFTFNHAIHWVRQAPGGQLEWVGGRRVPPVGIYKYGKFKQDRMLWEDDPAKTVFLDLRSLTSDDTGVVYCTRWRGCGDCLYDTAAYNDASDIWGGQTMVIVSA         |
| 11 <sup>a</sup> | H          | 1141564        | —                        | n/a                | 79.7                  | RVRLQSGAVVKKPGSSVTISCKPVGDTFTNFAISWVRQAPGGQLEWVGGRRVPPVGIYKYGKFKQDRMLWEDDPAKTVFLDLRSLTPDDTGVVYCARWRGCGDCLYDTAAYNDASDIWGGQTMVIVSA        |
| 12 <sup>a</sup> | H          | 4521170        | —                        | n/a                | 79.0                  | RVRLQSGAVVKKPGSSVTISCKPVGDTFTNFAISWVRQAPGGQLEWVGGRRVPPVGIYKYGKFKQDRMLWEDDPAKTVFLDLRSLTPDDTGVVYCARWRGCGDCLYDTAAYNDASDIWGGQTMVIVSA        |
| 13 <sup>a</sup> | H          | 1577295_dN     | —                        | n/a                | 94.9                  | VAGLLQSGAEVKKPGSSLDISCKPVGDTFTNFAIHWVRQAPGGQLEWVGGRRVPPVGIYKYGKFKFHDRRLRYEDDPMKTVFLELRSLTSDDTGVVYCTRWRGCGMCPYDTSYNDASDIWGGQTKVIVSA      |
| 14 <sup>a</sup> | H          | 3385754_dN     | —                        | n/a                | 95.6                  | GRVLQSGAEWTKPGSTVDNAPCKTVGGTFTKFAIHWVRQAPGGQLEWVGGRRVPPVGIYKYGKFKFHDRRLRYEDDPMKTVFLELRSLTSDDTGVVYCTRWRGCGMCPYDTSYNDASDIWGGQTKVIVSA      |
| 15 <sup>a</sup> | H          | 552047         | —                        | n/a                | 96.7                  | RCVPRRLLQSGADGWNPEFGSSVTISCKPVGDTFTNFAIHWVRQAPGGQLEWVGGRRVPPVGIYKYGKFKFHDRRLRYEDDPMKTVFLELRSLTSDDTGVVYCTRWRGCGMCPYDTSYNDASDIWGGQTKVIVSA |
| 16 <sup>a</sup> | H          | 1759061        | —                        | n/a                | 94.6                  | HVRLQSGAEVKKPGSSVTISCKPVGDTFTNFAIHWVRQAPGGQLEWVGGRRVPPVGIYKYGKFKFHDRRLRYEDDPMKTVFLELRSLTSDDTGVVYCTRWRGCGMCPYDTSYNDASDIWGGQTKVIVSA       |
| 17 <sup>a</sup> | H          | 1278991        | —                        | n/a                | 95.9                  | HVRLQSGADGWNKPKGSSVTISCKPVGDTFTNFAIHWVRQAPGGQLEWVGGRRVPPVGIYKYGKFKFHDRRLRYEDDPMKTVFLELRSLTSDDTGVVYCTRWRGCGMCPYDTSYNDASDIWGGQTKVIVSA     |
| 18 <sup>a</sup> | H          | 2288360        | 2.7                      | 67                 | 97.4                  | HVRLQSGAEAKKPGSSVTISCKPVGDTFTNFAIHWVRQAPGGQLEWVGGRRVPPVGIYKYGKFKFHDRRLRYEDDPMKTVFLELRSLTSDDTGVVYCTRWRGCGMCPYDTSYNDASDIWGGQTKVIVSA       |
| 19 <sup>a</sup> | H          | 1797956        | 6.4                      | 33                 | 82.8                  | TVRLQSGAEVKKPGSSVRSCKPLGGFTFNHAIHWVRQAPGGQLEWVGGRRVPPVGIYKYGKFKQDRMLWEDDPAKTVFLDLRSLTSDDTGVVYCTRWRGCGDCLYDTAAYNDASDIWGGQTMVIVSA         |
| 20 <sup>a</sup> | H          | 1719278_dN     | —                        | n/a                | 97.9                  | VAGLLQSGAEVKKPGSSVTISCKPVGDTFTNFAIHWVRQAPGGQLEWVGGRRVPPVGIYKYGKFKFHDRRLRYEDDPMKTVFLELRSLTSDDTGVVYCTRWRGCGMCPYDTSYNDASDIWGGQTKVIVSA      |
| 21 <sup>a</sup> | H          | 3140010        | —                        | n/a                | 96.4                  | PVRLVQSGAEVKKPGSSVTISCKPVGDTFTNFAIHWVRQAPGGQLEWVGGRRVPPVGIYKYGKFKFHDRRLRYEDDPMKTVFLELRSLTSDDTGVVYCTRWRGCGMCPYDTSYNDASDIWGGQTKVIVSA      |
| 22 <sup>a</sup> | H          | 364904         | —                        | n/a                | 95.9                  | PVLLQSGAEVKKPGSSVTISCKPVGDTFTNFAIHWVRQAPGGQLEWVGGRRVPPVGIYKYGKFKQDRMLWEDDPMKTVFLELRSLTSDDTGVVYCTRWRGCGMCPYDTSYNDASDIWGGQTKVIVSA         |
| 23 <sup>a</sup> | H          | 3656520        | 2.8                      | 0                  | 97.9                  | TVRLVQSGAEVKKPGSSVTISCKPVGDTFTNFAIHWVRQAPGGQLEWVGGRRVPPVGIYKYGKFKFHDRRLRYEDDPMKTVFLELRSLTSDDTGVVYCTRWRGCGMCPYDTSYNDASDIWGGQTKVIVSA      |
| 24 <sup>a</sup> | H          | 3639936        | 6.1                      | 8                  | 97.9                  | QVRLQSGAEVKKPGSSVTISCKPVGDTFTNFAIHWVRQAPGGQLEWVGGRRVPPVGIYKYGKFKFHDRRLRYEDDPMKTVFLELRSLTSDDTGVVYCTRWRGCGMCPYDTSYNDASDIWGGQTKVIVSA       |
| 25 <sup>a</sup> | H          | 2534625_dN     | —                        | n/a                | 96.7                  | VAGLLQSGAEVKKPGSSVTISCKPVGDTFTNFAIHWVRQAPGGQLEWVGGRRVPPVGIYKYGKFKFHDRRLRYEDDPMKTVFLELRSLTSDDTGVVYCTRWRGCGMCPYDTSYNDASDIWGGQTKVIVSA      |
| 26 <sup>b</sup> | H          | 3162349        | 1.0                      | 0                  | 69.0                  | QVQLVQSGAEVKKPGSSVKSCKASGDTFSSYAIHWVRQAPGGQLEWVGGRRVPPVGIYKYGKFKFHDRRLRYEDDPMKTVFLELRSLTSDDTGVVYCTRWRGCGMCPYDTSYNDASDIWGGQTKVIVSA       |
| 27 <sup>b</sup> | H          | 1064503        | 1.7                      | 0                  | 65.9                  | QVHLVQSGAEVKKPGSSVKSCKASGDTFSSYAIHWVRQAPGGQLEWVGGRRVPPVGIYKYGKFKFHDRRLRYEDDPMKTVFLELRSLTSDDTGVVYCTRWRGCGMCPYDTSYNDASDIWGGQTKVIVSA       |
| 28 <sup>b</sup> | H          | 1201231        | —                        | n/a                | 70.3                  | QVQLVQSGAEVKKPGSSVKSCKASGDTFSSYAIHWVRQAPGGQLEWVGGRRVPPVGIYKYGKFKFHDRRLRYEDDPMKTVFLELRSLTSDDTGVVYCTRWRGCGMCPYDTSYNDASDIWGGQTKVIVSA       |
| 29 <sup>b</sup> | H          | 1047823        | —                        | n/a                | 67.7                  | QVQLVQSGAEVKKPGSSVKSCKASGDTFSSYAIHWVRQAPGGQLEWVGGRRVPPVGIYKYGKFKFHDRRLRYEDDPMKTVFLELRSLTSDDTGVVYCTRWRGCGMCPYDTSYNDASDIWGGQTKVIVSA       |
| 30 <sup>b</sup> | H          | 1041439        | —                        | n/a                | 63.6                  | QVQLVESGAEVKKPGSSVAVSCKASGDTFSSYAIHWVRQAPGGQLEWVGGRRVPPVGIYKYGKFKFHDRRLRYEDDPMKTVFLELRSLTSDDTGVVYCTRWRGCGMCPYDTSYNDASDIWGGQTKVIVSA      |
| 31 <sup>b</sup> | H          | 129610         | —                        | n/a                | 67.7                  | QVQLVQSGAEVKKPGSSVKSCKASGDTFSSYAIHWVRQAPGGQLEWVGGRRVPPVGIYKYGKFKFHDRRLRYEDDPMKTVFLELRSLTSDDTGVVYCTRWRGCGMCPYDTSYNDASDIWGGQTKVIVSA       |
| 32 <sup>b</sup> | H          | 103511         | —                        | n/a                | 66.4                  | QAQLHLVQSGAEVKKPGSSVRSCKASGDTFSSYAIHWVRQAPGGQLEWVGGRRVPPVGIYKYGKFKFHDRRLRYEDDPMKTVFLELRSLTSDDTGVVYCTRWRGCGMCPYDTSYNDASDIWGGQTKVIVSA     |
| 33 <sup>b</sup> | H          | 1006836        | 4.7                      | 33                 | 70.0                  | RVQLVQSGPEVKKPGSSVKSCKAAGDTFSSYAIHWVRQAPGGQLEWVGGRRVPPVGIYKYGKFKFHDRRLRYEDDPMKTVFLELRSLTSDDTGVVYCTRWRGCGMCPYDTSYNDASDIWGGQTKVIVSA       |
| 34 <sup>b</sup> | H          | 1730326        | —                        | n/a                | 67.2                  | QVRLQSGAEVQKPGSSVKSCKASGDTFSSYAIHWVRQAPGGQLEWVGGRRVPPVGIYKYGKFKFHDRRLRYEDDPMKTVFLELRSLTSDDTGVVYCTRWRGCGMCPYDTSYNDASDIWGGQTKVIVSA        |
| 35 <sup>b</sup> | H          | 1168805        | —                        | n/a                | 69.0                  | QVQLVQSGAEVKKPGSSVKSCKASGDTFSSYAIHWVRQAPGGQLEWVGGRRVPPVGIYKYGKFKFHDRRLRYEDDPMKTVFLELRSLTSDDTGVVYCTRWRGCGMCPYDTSYNDASDIWGGQTKVIVSA       |

Listed items include sequence number, antibody chain type, sequence index in the PGM data set, protein yield, neutralization, sequence identity to 438-B11 heavy chain determined during the pipeline processing, and amino acid sequence. No expression (—) denotes protein yield less than 0.5 mg/L. Neutralizing activity was tested against viruses on Global Panel. n/a, not available.

<sup>a</sup> Heavy chains are related to 438-D5/B11 but cover a wide range of sequence identity and HCDR3 motifs.

<sup>b</sup> All sequences have a similar HCDR loop length of 20-23 aa

**Table S2D. Expression of antibodies with selected 2008 light chain variants paired with the 438-D5 heavy chain.**

| No.            | Chain type | Sequence index | Yield (mg/L culture sup) | Neutralization (%) | Sequence identity (%) | Amino acid sequence of variable domain                                                                    |
|----------------|------------|----------------|--------------------------|--------------------|-----------------------|-----------------------------------------------------------------------------------------------------------|
| 1 <sup>a</sup> | K          | 1181460        | 2.1                      | 67                 | 97.2                  | DIVLTQSPVTLSSSGEAGTLCRASQNISSSWIAWYQRRGQVPRLLISAASARAAGIPDRFTGRGSGTDFTLTISRLEPEDFGVYSCQYGGFFSFGPGTQVDVK   |
| 2 <sup>a</sup> | K          | 1611025        | 8.6                      | 67                 | 87.3                  | DIVLTQSPGTLSSSGETGTLSCRASQNISSSWIAWYHRRGQVPRLLIYAASSRAGGIPDRFSGSGSGTDFTLTISRLEHGFGLYCYQYGGFFFTFGPGTPVDVK  |
| 3 <sup>a</sup> | K          | 3391100        | —                        | n/a                | 96.0                  | HIVLTQSPVTLSSSGKTGTLSCRASQNISSSWIAWYQRRGQSPRLLISAASARAAGIPDRFTGRGSGTDFTLTITRLEPEDFGVYSCQYGGFFFTFGPGTQVDVK |
| 4 <sup>a</sup> | K          | 1540803        | 22.4                     | 67                 | 86.1                  | TIVLTQSPGTLSSSGETGTLSCRASQNISSSWIAWYHRRGQVPRLLIYATSSRAGGIPDRFSGSGSGTDFTLTISRLEHGFGLYCYQYGGFFFTFGPGTPVDVK  |
| 5 <sup>a</sup> | K          | 1093646        | 3.2                      | 67                 | 96.9                  | TIVLTQSPVTLSSSGETGTLSCRASQNISSSWIAWYQRRGQVPRLLISAASARAAGIPDRFTGRGSGTDFTLTISRLEPEDFGVYSCQYGGFFSFGPGTQVDVK  |

Listed items include sequence number, antibody chain type, sequence index in the PGM data set, protein yield, neutralization, sequence identity to 438-B11 light chain determined during the pipeline processing, and amino acid sequence. No expression (—) denotes protein yield less than 0.5 mg/L. Neutralizing activity was tested against viruses on Global Panel. n/a, not available.

<sup>a</sup> Cover a wide range of sequence identity and KCDR3 motifs.

**Table S2E. Expression of antibodies with selected 2012 heavy chain variants paired with the 438-D5 light chain.**

| No.              | Chain type | Sequence index | Yield (mg/L culture sup) | Neutralization (%) | Sequence identity (%) | Amino acid sequence of variable domain                                                                                              |
|------------------|------------|----------------|--------------------------|--------------------|-----------------------|-------------------------------------------------------------------------------------------------------------------------------------|
| 1 <sup>a</sup>   | H          | 1273901        | 5.0                      | 67                 | 97.4                  | QVRLQSGAEVKKPGSSVTLSCKPVGDTFTNFALHWVRQAPQGQLEWVGRVVPVVGIIYKYGKKFQDRRLRYEDDPMKAVFLELRSLTSDDTGVYYCTRWRGCGMCPYDTSYNDASDVWGPVKTVIVSA    |
| 2 <sup>a</sup>   | H          | 2070251        | —                        | n/a                | 80.3                  | QVRLQSGAEVKKPGSSVRVSKPLGGFIHNHALHWVRQAPQGQLEWVGRVVPVVGIIYKYGKKFQDRRLTFEDDPMKIVYLELSGLTSDDTGVYYCTRWRGCLDCHADTTPYNDASEIWPVTMTIVSA     |
| 3 <sup>b,c</sup> | H          | 1128948        | —                        | n/a                | 68.7                  | QVQLVQSGAEVKKPGSSLLKVSCKASGGTFNSYALSWVRQAPQGQLEWLGIIIPVFGTVNYAQKFKQGRVTITADEFTSTAYMELSSLTSEDVAVYYCARAYCTQSSCYPEWGYYYYYMDVWKGTTVTASS |
| 4 <sup>b,c</sup> | H          | 1802268        | 2.4                      | 8                  | 69.2                  | QVQLVQSGAEVKKPGSFVKVSKASGGTFNSYALSWVRQAPQGQLEWLGIIIPVFGTVNYAQKFKQGRVTITADEFTSTAYMELSSLTSEDVAVYYCARAYCTQSSCYPEWGYYYYYMDVWKGTTVTASS   |
| 5 <sup>b</sup>   | H          | 130290         | 32.2                     | 0                  | 69.0                  | QVLLVQSGAEVKKPGSSVKVSKASGGTFNFGNFAIHWVRQAPQGQLEWVGIIIPVYGSADYADKFKGRVTMTADDSTSTAYLEVSSLRSDDSAVYYCARGSQSTKVSMPAAVITYSYSDVWKGTTVTIVSS |
| 6 <sup>b</sup>   | H          | 1044069        | 1.3                      | 0                  | 69.5                  | QVQLVQSGAEVKKPGSSVKVSKASGGTLSNPFVLSWVRQAPQGQLEWLGFIPIGDI SNSAQNFQGRVTITADESNNTAYMDLSSLKFEDTAIYYCAIKTLTEAYYDDGLYYYYMDVWKGTTVTIVSS    |
| 7 <sup>b</sup>   | H          | 1023928        | 19.5                     | 8                  | 69.5                  | QVQLVQSGAEVKKPGSSVKVSKASGGTFNNSMNVWRQAPQGQLEWVGRIIPVFGTVNYAQKFKQGRVTITADKSTRTRAYMELSTLKSSEDVAVYYCARDSSEYVNFWSGTYMTRRGAFLMGQGTMTIVSS |
| 8 <sup>b,c</sup> | H          | 2390299        | —                        | n/a                | 61.5                  | QVQLVQSGPEVNEPSSVKVSKASGGTFKFLLSWVRSGPQQIDWVGKIIPVFGTGHYAPKFKQGRVSI TADTSTNTVYMAMSVSGSEDVAVYYCATLGDCSRSSCLFPVVRDGYMDVWKGTTIVSS      |
| 9 <sup>b,c</sup> | H          | 3171013        | —                        | n/a                | 64.4                  | QVQLVQSGPEVKKPGSSVKVSKASGGTFKISISWVRQAPQGQLEWVGKIIPLPFGTGHYAPKFKQGRVSI TADTSTNTVYMAMSVSGSEDVAVYYCATLGDCSRSSCLFPVVRAYMDVWKGTTIVSS    |

Listed items include sequence number, antibody chain type, sequence index in the PGM data set, protein yield, neutralization, sequence identity to 438-B11 heavy chain determined during the pipeline processing, and amino acid sequence. No expression (—) denotes protein yield less than 0.50 mg/L. Neutralizing activity was tested against viruses on Global Panel. n/a, not available.

<sup>a</sup> Heavy chains are related to 438-D5/B11 but cover a wide range of sequence identity and HCDR3 motifs.

<sup>b</sup> All sequences have a similar HCDR3 loop length of 20-23 aa.

<sup>c</sup> The HCDR3 loop has the same characteristic disulfide bond as 438-B11.

**Table S2F. Expression of antibodies with selected 2012 light chain variants paired with the 438-D5 heavy chain.**

| No.            | Chain type | Sequence index | Yield (mg/L culture sup) | Neutralization (%) | Sequence identity (%) | Amino acid sequence of variable domain                                                                           |
|----------------|------------|----------------|--------------------------|--------------------|-----------------------|------------------------------------------------------------------------------------------------------------------|
| 1 <sup>a</sup> | K          | 1720240        | 0.6                      | 17                 | 82.7                  | EIVLTQSPGTLSSLSPGERATLSCRASQTVNNDYLAWYQQKPGQAPRLLIYGASSRPTGIPDRFSGSGSGTDFTLTISRLPEPEFVAVYCCQVASSLPFTFGQGTTRLVIK  |
| 2 <sup>a</sup> | K          | 3926609        | —                        | n/a                | 86.7                  | EIVLTQSPGTLSSLSPGERATLSCRASQSVSASYLAWYQQKPGQAPRLLIYGASSRATGIPDRFSGSASGTDFTLTISRLPEPEFVAVYHCQQYGGSPLPFTFGQGTKVDIK |

Listed items include sequence number, antibody chain type, sequence index in the PGM data set, protein yield, neutralization, sequence identity to 438-B11 light chain determined during the pipeline processing, and amino acid sequence. No expression (—) denotes protein yield less than 0.5 mg/L. Neutralizing activity was tested against viruses on Global Panel. n/a, not available.

<sup>a</sup> Germline-like kappa chains.

**Table S3A. Neutralizing and binding activity of selected NGS-derived 438-B11/D5 somatic heavy variants paired with 438-D5 light chain.**

| Tier-1 virus and global panel       |      |                       | 2005      |         |         |         |         | 2008    |         |         |         |         |         | 2012    |         |         | control |         |        |       |
|-------------------------------------|------|-----------------------|-----------|---------|---------|---------|---------|---------|---------|---------|---------|---------|---------|---------|---------|---------|---------|---------|--------|-------|
| Clade                               | Tier | Pseudovirus           | 05HC-01   | 05HC-02 | 05HC-03 | 05HC-04 | 05HC-05 | 08HC-01 | 08HC-04 | 08HC-08 | 08HC-18 | 08HC-19 | 08HC-24 | 08HC-33 | 12HC-01 | 12HC-04 | 12HC-07 | 438-B11 | 438-D5 | VRC01 |
| B                                   | 1A   | SF162                 | >50       | >50     | 4.05    | >50     | 9.52    | 0.01    | 0.01    | 0.04    | 0.01    | 1.74    | >50     | 5.61    | 0.04    | 16.12   | 35.23   | 0.02    | 0.02   | 0.48  |
| C                                   | 1A   | MW965                 | 50.0<br>0 | >50     | >50     | >50     | 37.04   | 0.11    | 1.14    | 21.50   | 0.25    | >50     | >50     | >50     | 11.69   | >50     | >50     | 1.19    | 1.75   | 0.07  |
| A                                   | 2    | 398-F1 <sup>a</sup>   | 23.8<br>1 | 41.67   | 20.83   | 37.04   | --      | 0.02    | 0.03    | 0.13    | 0.01    | 25.78   | 41.08   | 11.57   | 0.18    | 19.05   | 47.38   | 0.02    | 0.03   | 0.41  |
| B                                   | 2    | TRO.11 <sup>a</sup>   | >50       | >50     | 27.78   | --      | --      | 0.09    | 0.08    | 0.92    | 0.03    | >50     | >50     | >50     | 0.93    | >50     | >50     | 0.07    | 0.14   | 0.77  |
|                                     | 2    | X2278 <sup>a</sup>    | 45.4<br>5 | --      | 33.33   | --      | --      | 0.03    | 0.03    | 0.08    | 0.04    | 14.22   | >50     | 18.13   | 1.33    | >50     | >50     | 0.09    | 0.08   | 0.35  |
| C                                   | 2    | 25710 <sup>a</sup>    | >50       | >50     | >50     | >50     | >50     | 0.23    | 0.53    | 10.16   | 0.18    | >50     | >50     | >50     | 6.06    | >50     | >50     | 0.64    | 0.55   | 0.87  |
|                                     | 2    | Ce0217 <sup>a</sup>   | >50       | >50     | >50     | >50     | 20.41   | 0.39    | 0.34    | 3.99    | 0.17    | >50     | >50     | >50     | 24.39   | >50     | >50     | 4.53    | 1.67   | 0.42  |
|                                     | 2    | Ce1176 <sup>a</sup>   | >50       | >50     | >50     | >50     | >50     | 0.13    | 0.18    | 0.48    | 0.08    | >50     | >50     | 20.15   | 0.92    | >50     | >50     | 0.34    | 0.33   | 4.88  |
| G                                   | 2    | X1632 <sup>a</sup>    | >50       | --      | >50     | --      | --      | >50     | >50     | >50     | >50     | >50     | >50     | >50     | >50     | >50     | >50     | >50     | >50    | 0.31  |
| CRF01_AE                            | 2    | CNE55 <sup>a</sup>    | >50       | --      | >50     | --      | --      | >50     | >50     | >50     | >50     | >50     | >50     | >50     | >50     | >50     | >50     | >50     | >50    | 0.64  |
|                                     | 2    | CNE8 <sup>a</sup>     | >50       | --      | >50     | --      | --      | >50     | >50     | >50     | >50     | >50     | >50     | >50     | >50     | >50     | >50     | >50     | >50    | 0.56  |
| CRF07_BC                            | 2    | BJOX2000 <sup>a</sup> | 41.6<br>7 | >50     | 47.62   | >50     | --      | 0.03    | 0.04    | 0.13    | 0.02    | 2.53    | >50     | >50     | 0.21    | >50     | >50     | 0.06    | 0.07   | >50   |
|                                     | 2    | CH119 <sup>a</sup>    | 37.0<br>4 | >50     | 23.81   | >50     | --      | 0.10    | 0.21    | 0.57    | 0.05    | 17.93   | >50     | 20.92   | 0.62    | >50     | >50     | 0.14    | 0.22   | 1.56  |
| AC                                  | 2    | 246 <sup>a</sup>      | --        | --      | >50     | --      | --      | >50     | >50     | 20.66   | >50     | >50     | >50     | >50     | >50     | >50     | >50     | >50     | >50    | 0.51  |
| Binding to BG505 probe <sup>b</sup> |      |                       | +         | +/-     | ++++    | +       | +++     | ++++    | ++++    | ++++    | ++++    | ++++    | +++     | ++++    | ++++    | ++      | ++      | ++++    | ++++   | ++++  |
| Potency on global panel             |      |                       | 35.9<br>5 | 41.67   | 29.37   | 37.04   | 20.41   | 0.08    | 0.11    | 0.87    | 0.05    | 11.36   | 41.08   | 17.24   | 1.19    | 19.05   | 47.38   | 0.18    | 0.19   | 0.69  |
| Breadth% on global panel            |      |                       | 36        | 14      | 42      | 17      | 33      | 67      | 67      | 75      | 67      | 33      | 8       | 33      | 67      | 8       | 8       | 67      | 67     | 92    |

The neutralizing potency of the mAbs was measured as IC<sub>50</sub> in µg/ml. Values < 0.2 µg/ml are highlighted in red, 0.2~2 µg/ml in yellow, 2~50 µg/ml in green.

The neutralizing breadth was calculated as the percentage of viruses neutralized with IC<sub>50</sub> < 50 µg/ml.

"--": not tested.

<sup>a</sup>Global panel of 12 HIV-1 Env strains.

<sup>b</sup>Binding capacity was tested to the sorting probe BG505 by ELISA and categorized based on the OD<sub>450</sub> value at the 10 µg/ml of antibody tested.

"++++": OD<sub>450</sub> ≥ 3.0; "+++": 2.0 ≤ OD<sub>450</sub> < 3.0; "++": 1.0 ≤ OD<sub>450</sub> < 2.0; "+": 0.2 ≤ OD<sub>450</sub> < 1.0; "+/-": 0.1 ≤ OD<sub>450</sub> < 0.2; "-": OD<sub>450</sub> < 0.1.

**Table S3B. Neutralizing and binding activity of selected NGS-derived 438-B11/D5 somatic light variants paired with 438-D5 heavy chain.**

| Tier-1 virus and global panel             |      |                       | 2005    |         |         | 2008    |         |         |         | 2012    | control |        |       |
|-------------------------------------------|------|-----------------------|---------|---------|---------|---------|---------|---------|---------|---------|---------|--------|-------|
| Clade                                     | Tier | Pseudovirus           | 05KC-01 | 05KC-03 | 05KC-04 | 08KC-01 | 08KC-02 | 08KC-04 | 08KC-05 | 12KC-01 | 438-B11 | 438-D5 | VRC01 |
| B                                         | 1A   | SF162                 | 0.02    | 0.02    | 0.02    | 0.01    | 0.01    | 0.03    | 0.02    | 7.40    | 0.02    | 0.02   | 0.48  |
| C                                         | 1A   | MW965                 | 0.40    | 0.24    | 0.08    | 2.04    | 6.19    | 8.07    | 1.80    | >50     | 1.19    | 1.75   | 0.07  |
| A                                         | 2    | 398-F1 <sup>a</sup>   | 0.03    | 0.02    | 0.03    | 0.01    | 0.03    | 0.04    | 0.02    | 41.67   | 0.02    | 0.03   | 0.41  |
| B                                         | 2    | TRO.11 <sup>a</sup>   | 0.20    | 0.22    | 0.22    | 0.08    | 0.15    | 0.19    | 0.11    | >50     | 0.07    | 0.14   | 0.77  |
|                                           | 2    | X2278 <sup>a</sup>    | 0.15    | 0.09    | 0.06    | 0.07    | 0.17    | 0.18    | 0.04    | >50     | 0.09    | 0.08   | 0.35  |
| C                                         | 2    | 25710 <sup>a</sup>    | 1.26    | 0.90    | 1.23    | 0.36    | 2.38    | 4.13    | 0.73    | >50     | 0.64    | 0.55   | 0.87  |
|                                           | 2    | Ce0217 <sup>a</sup>   | 9.96    | 8.43    | 6.14    | 3.65    | 4.43    | 12.53   | 1.88    | >50     | 4.53    | 1.67   | 0.42  |
|                                           | 2    | Ce1176 <sup>a</sup>   | 0.20    | 0.21    | 0.27    | 0.13    | 0.19    | 0.24    | 0.11    | >50     | 0.34    | 0.33   | 4.88  |
| G                                         | 2    | X1632 <sup>a</sup>    | >50     | >50     | >50     | >50     | >50     | >50     | >50     | >50     | >50     | >50    | 0.31  |
| CRF01_AE                                  | 2    | CNE55 <sup>a</sup>    | >50     | >50     | >50     | >50     | >50     | >50     | >50     | >50     | >50     | >50    | 0.64  |
|                                           | 2    | CNE8 <sup>a</sup>     | >50     | >50     | >50     | >50     | >50     | >50     | >50     | >50     | >50     | >50    | 0.56  |
| CRF07_BC                                  | 2    | BJOX2000 <sup>a</sup> | 0.06    | 0.06    | 0.06    | 0.02    | 0.04    | 0.03    | 0.02    | 45.00   | 0.06    | 0.07   | >50   |
|                                           | 2    | CH119 <sup>a</sup>    | 0.23    | 0.20    | 0.23    | 0.10    | 0.19    | 0.22    | 0.13    | >50     | 0.14    | 0.22   | 1.56  |
| AC                                        | 2    | 246 <sup>a</sup>      | >50     | >50     | >50     | >50     | >50     | >50     | >50     | >50     | >50     | >50    | 0.51  |
| <b>Binding to BG505 probe<sup>b</sup></b> |      |                       | ++++    | ++++    | ++++    | ++++    | ++++    | ++++    | ++++    | ++++    | ++++    | ++++   | ++++  |
| <b>Potency on global panel</b>            |      |                       | 0.27    | 0.23    | 0.24    | 0.11    | 0.24    | 0.32    | 0.12    | 43.30   | 0.18    | 0.19   | 0.69  |
| <b>Breadth% on global panel</b>           |      |                       | 67      | 67      | 67      | 67      | 67      | 67      | 67      | 17      | 67      | 67     | 92    |

The neutralizing potency of the mAbs was measured as IC<sub>50</sub> in µg/ml. Values < 0.2 µg/ml are highlighted in red, 0.2~2 µg/ml in yellow, 2~50 µg/ml in green.

The neutralizing breadth was calculated as the percentage of viruses neutralized with IC<sub>50</sub> < 50 µg/ml.

"-": not tested.

<sup>a</sup>Global panel of 12 HIV-1 Env strains.

<sup>b</sup> Binding capacity was tested to the sorting probe (HR1-redesigned BG505 trimer) by ELISA and categorized based on OD<sub>450</sub> value at 10 µg/ml of antibody tested.

"++++": OD<sub>450</sub> ≥ 3.0; "+++": 2.0 ≤ OD<sub>450</sub> < 3.0; "++": 1.0 ≤ OD<sub>450</sub> < 2.0; "+": 0.2 ≤ OD<sub>450</sub> < 1.0; "+/-": 0.1 ≤ OD<sub>450</sub> < 0.2; "-": OD<sub>450</sub> < 0.1.

**Table S3C. Anti-viral human antibodies with intra-HCDR3 disulfide bond(s).<sup>a</sup>**

| Antibody                    | HCDR3                                    | Germline   | PDB ID  | Virus Target (epitope)          |
|-----------------------------|------------------------------------------|------------|---------|---------------------------------|
| <b>438-B11 (this study)</b> | WRGCGMCPYDTSSYYNDASDV                    | IGHV1-69   | 6UUH *  | HIV-1 Env (Glycan supersite)    |
| <b>438-D5 (this study)</b>  | WRGCGMCPYDTSSYYNDASDV                    | IGHV1-69   | 6UUL *  | HIV-1 Env (Glycan supersite)    |
| VRC03                       | VRRGSCDYCGDFPWQY                         | IGHV1-02   | 5JXA *  | HIV-1 Env (RBS)                 |
| VRC03GL                     | ARRGSCDYCGDFPWQY                         | IGHV1-02   | 5JOF *  | HIV-1 Env (RBS)                 |
| VRC06B                      | VRKGPSCPFCGDFHWQH                        | IGHV1-02   | 4XNZ *  | HIV-1 Env (RBS)                 |
| 45-VRC01.H03+06.D-001739    | VRKGPSCPFCGDFHWQH                        | IGHV1-02   | 4S1Q *  | HIV-1 Env (RBS)                 |
| VRC06                       | VRRGSSCPFCGDFHFEH                        | IGHV1-02   | 4JB9 *  | HIV-1 Env (RBS)                 |
| 45-VRC01.H5.F-185917        | VRTADCDERDPCKGWVFPH                      | IGHV1-02   | 4S1S *  | HIV-1 Env (RBS)                 |
| VRC08                       | VRGRSCCGRRHCNGADCFNWFQH                  | IGHV1-02   | 4XMP ** | HIV-1 Env (RBS)                 |
| VRC08c                      | VRGKSCCNGRRYCNGADCFNWFQY                 | IGHV1-02   | 4XNY ** | HIV-1 Env (RBS)                 |
| 45.VRC01.H08.F-117225       | VRGKSCCNGRRYCNGADCFNWFQY                 | IGHV1-02   | 4S1R ** | HIV-1 Env (RBS)                 |
| CAP256-VRC26.03             | AKDLREDECEEWSDYYDFGKQLPCRKSRGVAGIFDG     | IGHV3-30   | 4OD1 *  | HIV-1 Env (V1-V2)               |
| CAP256-VRC26.04             | AKDLREDECEEWSDYYDFGKQLPCRKSRGVAGIFDK     | IGHV3-30   | 4ORG *  | HIV-1 Env (V1-V2)               |
| CAP256-VRC26.07             | AKDLREDECEEWSDYYDFGKQLPCRKSRGVAGVFDK     | IGHV3-30   | 4OD3 *  | HIV-1 Env (V1-V2)               |
| CAP256-VRC26.10             | AKDMREYECEYWTSDYYDFGRPQPCIDRRGVVGI FDM   | IGHV3-30   | 4OCS *  | HIV-1 Env (V1-V2)               |
| CAP256-VRC26.25             | AKDLREDECEEWSDYYDFGKQLPCA KSRGGLVGIADN   | IGHV3-30   | 5DT1 *  | HIV-1 Env (V1-V2)               |
| CAP256-VRC26.06             | ARDLRELECEEWTL YNYYDFGSRGPCVDPRGVAGSFVDV | IGHV3-30   | 4OCW *  | HIV-1 Env (V1-V2)               |
| F045-092                    | AGPSITESHYCLDCAAKDY YGLDV                | IGHV1-69   | 4O58 *  | Influenza HA (RBS)              |
| FluA-20                     | ARGTEDLG YCSGSCP NH                      | IGHV4-61   | 6OBZ *  | Influenza HA (trimer interface) |
| F10                         | ARSPSY ICSGGTCVFDH                       | IGHV1-69   | 3FKU *  | Influenza HA (stem region)      |
| FLD194                      | HASCSARSCYWG PVDY                        | IGHV5-51   | 5A3I *  | Influenza HA (RBS)              |
| HEPC3                       | ARDGVRYCGGGR CYNWFDP                     | IGHV1-69   | 6MED *  | Hepatitis-C E2                  |
| HEPC74                      | ARDLLKYCGGGN CHSLLVDP                    | IGHV1-69   | 6MEE *  | Hepatitis-C E2                  |
| AR3A                        | VRPETPRYCSGGFCYGEFDN                     | IGHV1-69   | 6BKB *  | Hepatitis-C E2                  |
| AR3C                        | VRSVTPRYCSGGFCYGEFDY                     | IGHV1-69   | 4MWF *  | Hepatitis-C E2                  |
| ADI-19425                   | ARLG YCSGGSCHFDY                         | IGHV3-21   | 6APC *  | RSV F                           |
| CB0002.5                    | ARSGFCSDDAC YRRGSWFDP                    | IGHV4-4/59 | 6BLI *  | RSV G                           |
| CR9501                      | AACGAYVLI SNCGWFDS                       | IGHV4-31   | 6OE4 *  | RSV F                           |
| 8f9                         | ARDGKCGGGR CYSGLLDY                      | IGHV3-30   | 3EYF *  | humCMV Env (AD2S1)              |
| m336                        | ARVGYCSSTSCNRGAFDI                       | IGHV1-69   | 4XAK *  | MERS-CoV (RBS)                  |
| CDC2-C2                     | AREGGHQGYCSGGSCYDFDY                     | IGHV1-69   | 6C6Z *  | MERS-CoV (RBS)                  |
| R13                         | ASLPYCSGRICRPRTDY                        | IGHV4-31   | 6IEA *  | RVFV Env Gn                     |
| CR1-10                      | ARLTSDCSGGNCYQAFDY                       | IGHV4-31   | 5W1K *  | JUNV Env GP1 (RBS)              |

<sup>a</sup> Human antibodies targeting non-viral antigens (e.g. PDB IDs: 4PTU, 4VID, 4N2U, 2HFG, 2IG2, 5IFJ, and 5BV7) are not listed in this table.

RBS = Receptor-binding site

RSV = Respiratory Syncytial Virus

HA = Hemagglutinin

humCMV = human cytomegalovirus

MERS-CoV = Middle East respiratory syndrome coronavirus

RVFV = Rift Valley fever virus

JUNV = Junin virus (causing human hemorrhagic fever)

\* One intra-HCDR3 disulfide bond; \*\* Two intra-HCDR3 disulfide bonds



**Table S3D. X-ray crystallographic data collection and refinement statistics**

| <b>Data collection</b>                           | BG505 UFO.664, Fabs 438-B11,<br>35O22   | Fab 438-B11 & PG                              | Fab 438-B11ΔSS                                 | Fab 438-D5                                    |
|--------------------------------------------------|-----------------------------------------|-----------------------------------------------|------------------------------------------------|-----------------------------------------------|
| X-ray Source                                     | APS 23ID-D                              | SSRL 12-2                                     | APS 23ID-D                                     | APS 23ID-D                                    |
| Wavelength (Å)                                   | 1.033                                   | 0.979                                         | 1.033                                          | 1.033                                         |
| Detector                                         | Pilatus                                 | Pilatus                                       | Pilatus                                        | Pilatus                                       |
| Space group                                      | H32                                     | P2 <sub>1</sub>                               | P2 <sub>1</sub>                                | P2 <sub>1</sub> 2 <sub>1</sub> 2 <sub>1</sub> |
| Unit cell parameters                             | a = b = 247.3, c = 257.6 Å              | a = 71.1, b = 72.7, c = 108.7 Å<br>β = 101.1° | a = 104.1, b = 66.1, c = 108.8 Å<br>β = 117.9° | a = 92.7, b = 97.8, c = 125.5 Å               |
| Resolution (Å)                                   | 50.00 - 3.80 (3.87 - 3.80) <sup>a</sup> | 50.00 - 2.70 (2.75 - 2.70) <sup>a</sup>       | 50.00 - 2.10 (2.14 - 2.10)                     | 50.00 - 2.07 (2.14 - 2.07)                    |
| Observations                                     | 293,758                                 | 86,956                                        | 449,748                                        | 833,571                                       |
| Unique reflections                               | 29,804 (1,403) <sup>a</sup>             | 29,107 (1,479) <sup>a</sup>                   | 76,942 (3,836) <sup>a</sup>                    | 71,245 (6,892) <sup>a</sup>                   |
| Redundancy                                       | 9.9 (6.4) <sup>a</sup>                  | 3.0 (3.0) <sup>a</sup>                        | 5.8 (5.9) <sup>a</sup>                         | 11.7 (9.7) <sup>a</sup>                       |
| Completeness (%)                                 | 99.6 (95.2) <sup>a</sup>                | 96.6 (97.8) <sup>a</sup>                      | 99.9 (99.6) <sup>a</sup>                       | 99.8 (98.2) <sup>a</sup>                      |
| $\langle I/\sigma \rangle^b$                     | 13.0 (1.0) <sup>a</sup>                 | 12.9 (1.4) <sup>a</sup>                       | 9.1 (1.2) <sup>a</sup>                         | 22.8 (1.0) <sup>a</sup>                       |
| $R_{\text{sym}}^c$                               | 0.17 (1.19) <sup>a</sup>                | 0.10 (0.96) <sup>a</sup>                      | 0.17 (1.28) <sup>a</sup>                       | 0.19 (>1.0) <sup>a</sup>                      |
| $R_{\text{pim}}^c$                               | 0.05 (0.42) <sup>a</sup>                | 0.05 (0.53) <sup>a</sup>                      | 0.07 (0.52) <sup>a</sup>                       | 0.05 (0.79) <sup>a</sup>                      |
| CC <sub>1/2</sub>                                | 0.89 (0.47) <sup>a</sup>                | 0.89 (0.54) <sup>a</sup>                      | 0.84 (0.46) <sup>a</sup>                       | 0.88 (0.56) <sup>a</sup>                      |
| <b>Refinement statistics</b>                     |                                         |                                               |                                                |                                               |
| Resolution (Å)                                   | 49.44 - 3.80                            | 48.23 - 2.70                                  | 48.08 - 2.10                                   | 46.37 - 2.07                                  |
| Reflections (work)                               | 29,787                                  | 29,094                                        | 76,912                                         | 71,132                                        |
| $R_{\text{cryst}}(\%)^d / R_{\text{free}}(\%)^e$ | 29.9 / 31.7                             | 22.7 / 26.0                                   | 22.9 / 26.8                                    | 20.0 / 24.5                                   |
| No. atoms                                        |                                         |                                               |                                                |                                               |
| Protein                                          | 11,441                                  | 7,644                                         | 6,724                                          | 6,653                                         |
| Glycan                                           | 978                                     | 110                                           | 28                                             | 52                                            |
| Water                                            | -                                       | -                                             | 534                                            | 407                                           |
| Average <i>B</i> -value (Å <sup>2</sup> )        |                                         |                                               |                                                |                                               |
| Protein                                          | 163                                     | 57                                            | 37                                             | 55                                            |
| Glycan                                           | 163                                     | 56                                            | 36                                             | 54                                            |
| Water                                            | -                                       | 97                                            | 94                                             | 132                                           |
| Wilson <i>B</i> -value (Å <sup>2</sup> )         | 132                                     | -                                             | 40                                             | 54                                            |
|                                                  |                                         | 57                                            | 28                                             | 41                                            |
| RMSD from ideal geometry                         |                                         |                                               |                                                |                                               |
| Bond length (Å)                                  | 0.004                                   | 0.003                                         | 0.003                                          | 0.003                                         |
| Bond angles (°)                                  | 0.77                                    | 0.67                                          | 0.58                                           | 0.59                                          |
| Ramachandran statistics (%) <sup>f</sup>         |                                         |                                               |                                                |                                               |
| Favored                                          | 90.31                                   | 97.16                                         | 97.13                                          | 97.33                                         |
| Allowed                                          | 8.87                                    | 2.84                                          | 2.87                                           | 2.67                                          |
| Outliers                                         | 0.82                                    | 0                                             | 0                                              | 0                                             |
| PDB ID                                           | 6UTK                                    | 6UUH                                          | 6UUM                                           | 6UUL                                          |

<sup>a</sup> Numbers in parentheses refer to the highest resolution shell.<sup>b</sup> Calculated as average(*I*)/average( $\sigma I$ )

---

<sup>c</sup> $R_{\text{sym}} = \sum_{hkl} \sum_i |I_{hkl,i} - \langle I_{hkl} \rangle| / \sum_{hkl} \sum_i I_{hkl,i}$ , where  $I_{hkl,i}$  is the scaled intensity of the  $i^{\text{th}}$  measurement of reflection  $h, k, l$ ,  $\langle I_{hkl} \rangle$  is the average intensity for that reflection, and  $n$  is the redundancy.  $R_{\text{pim}}$  is a redundancy-independent measure of the quality of intensity measurements.  $R_{\text{pim}} = \sum_{hkl} (1/(n-1))^{1/2} \sum_i |I_{hkl,i} - \langle I_{hkl} \rangle| / \sum_{hkl} \sum_i I_{hkl,i}$ , where  $I_{hkl,i}$  is the scaled intensity of the  $i^{\text{th}}$  measurement of reflection  $h, k, l$ ,  $\langle I_{hkl} \rangle$  is the average intensity for that reflection, and  $n$  is the redundancy.

<sup>d</sup> $R_{\text{cryst}} = \sum_{hkl} |F_o - F_c| / \sum_{hkl} |F_o| \times 100$

<sup>e</sup> $R_{\text{free}}$  was calculated as for  $R_{\text{cryst}}$ , but on a test set comprising 5% of the data excluded from refinement.

<sup>f</sup>These values were calculated using MolProbity (<http://molprobity.biochem.duke.edu/>).

**Table S3E. X-ray crystallographic data collection and refinement statistics**

|                                                                          |                                         |
|--------------------------------------------------------------------------|-----------------------------------------|
| <b>Data collection</b>                                                   | BG505 UFO.664, Fabs 438-B11ΔSS, 35O22   |
| X-ray Source                                                             | SSRL 12-2                               |
| Wavelength (Å)                                                           | 0.979                                   |
| Detector                                                                 | Pilatus                                 |
| Space group                                                              | H3                                      |
| Unit cell parameters                                                     | a = b= 148.5, c = 843.5 Å               |
| Resolution (Å)                                                           | 50.00 – 6.51 (6.62 – 6.51) <sup>a</sup> |
| Observations                                                             | 55,947                                  |
| Unique reflections                                                       | 13,313 (638) <sup>a</sup>               |
| Redundancy                                                               | 4.2 (3.2) <sup>a</sup>                  |
| Completeness (%)                                                         | 97.5 (95.5) <sup>a</sup>                |
| $\langle I/\sigma \rangle$ <sup>b</sup>                                  | 7.3 (1.0) <sup>a</sup>                  |
| $R_{\text{sym}}$ <sup>c</sup>                                            | 0.19 (1.19) <sup>a</sup>                |
| $R_{\text{pim}}$ <sup>c</sup>                                            | 0.09 (0.64) <sup>a</sup>                |
| CC <sub>1/2</sub>                                                        | 0.85 (0.62) <sup>a</sup>                |
| <b>Refinement statistics</b>                                             |                                         |
| Resolution (Å)                                                           | 46.71 – 6.51                            |
| Reflections (work)                                                       | 13,258                                  |
| $R_{\text{cryst}}$ (%) <sup>d</sup> / $R_{\text{free}}$ (%) <sup>e</sup> | 30.7 / 35.5                             |
| No. atoms                                                                |                                         |
| Protein                                                                  | 22820                                   |
| Glycan                                                                   | 642                                     |
| Water                                                                    | -                                       |
| Average <i>B</i> -value (Å <sup>2</sup> )                                | 282                                     |
| Protein                                                                  | 283                                     |
| Glycan                                                                   | 252                                     |
| Water                                                                    | -                                       |
| Wilson <i>B</i> -value (Å <sup>2</sup> )                                 | 234                                     |
| RMSD from ideal geometry                                                 |                                         |
| Bond length (Å)                                                          | 0.003                                   |
| Bond angles (°)                                                          | 0.64                                    |
| Ramachandran statistics (%) <sup>f</sup>                                 |                                         |
| Favored                                                                  | 90.44                                   |
| Allowed                                                                  | 8.74                                    |
| Outliers                                                                 | 0.82                                    |
| PDB ID                                                                   | 6V6W                                    |

<sup>a</sup> Numbers in parentheses refer to the highest resolution shell.

<sup>b</sup> Calculated as average(*I*)/average( $\sigma I$ )

---

<sup>c</sup> $R_{\text{sym}} = \sum_{hkl} \sum_i | I_{hkl,i} - \langle I_{hkl} \rangle | / \sum_{hkl} \sum_i I_{hkl,i}$ , where  $I_{hkl,i}$  is the scaled intensity of the  $i^{\text{th}}$  measurement of reflection  $h, k, l$ ,  $\langle I_{hkl} \rangle$  is the average intensity for that reflection, and  $n$  is the redundancy.  $R_{\text{pim}}$  is a redundancy-independent measure of the quality of intensity measurements.  $R_{\text{pim}} = \sum_{hkl} (1/(n-1))^{1/2} \sum_i | I_{hkl,i} - \langle I_{hkl} \rangle | / \sum_{hkl} \sum_i I_{hkl,i}$ , where  $I_{hkl,i}$  is the scaled intensity of the  $i^{\text{th}}$  measurement of reflection  $h, k, l$ ,  $\langle I_{hkl} \rangle$  is the average intensity for that reflection, and  $n$  is the redundancy.

<sup>d</sup> $R_{\text{cryst}} = \sum_{hkl} | F_o - F_c | / \sum_{hkl} | F_o | \times 100$

<sup>e</sup> $R_{\text{free}}$  was calculated as for  $R_{\text{cryst}}$ , but on a test set comprising 5% of the data excluded from refinement.

<sup>f</sup>These values were calculated using MolProbity (<http://molprobity.biochem.duke.edu/>).

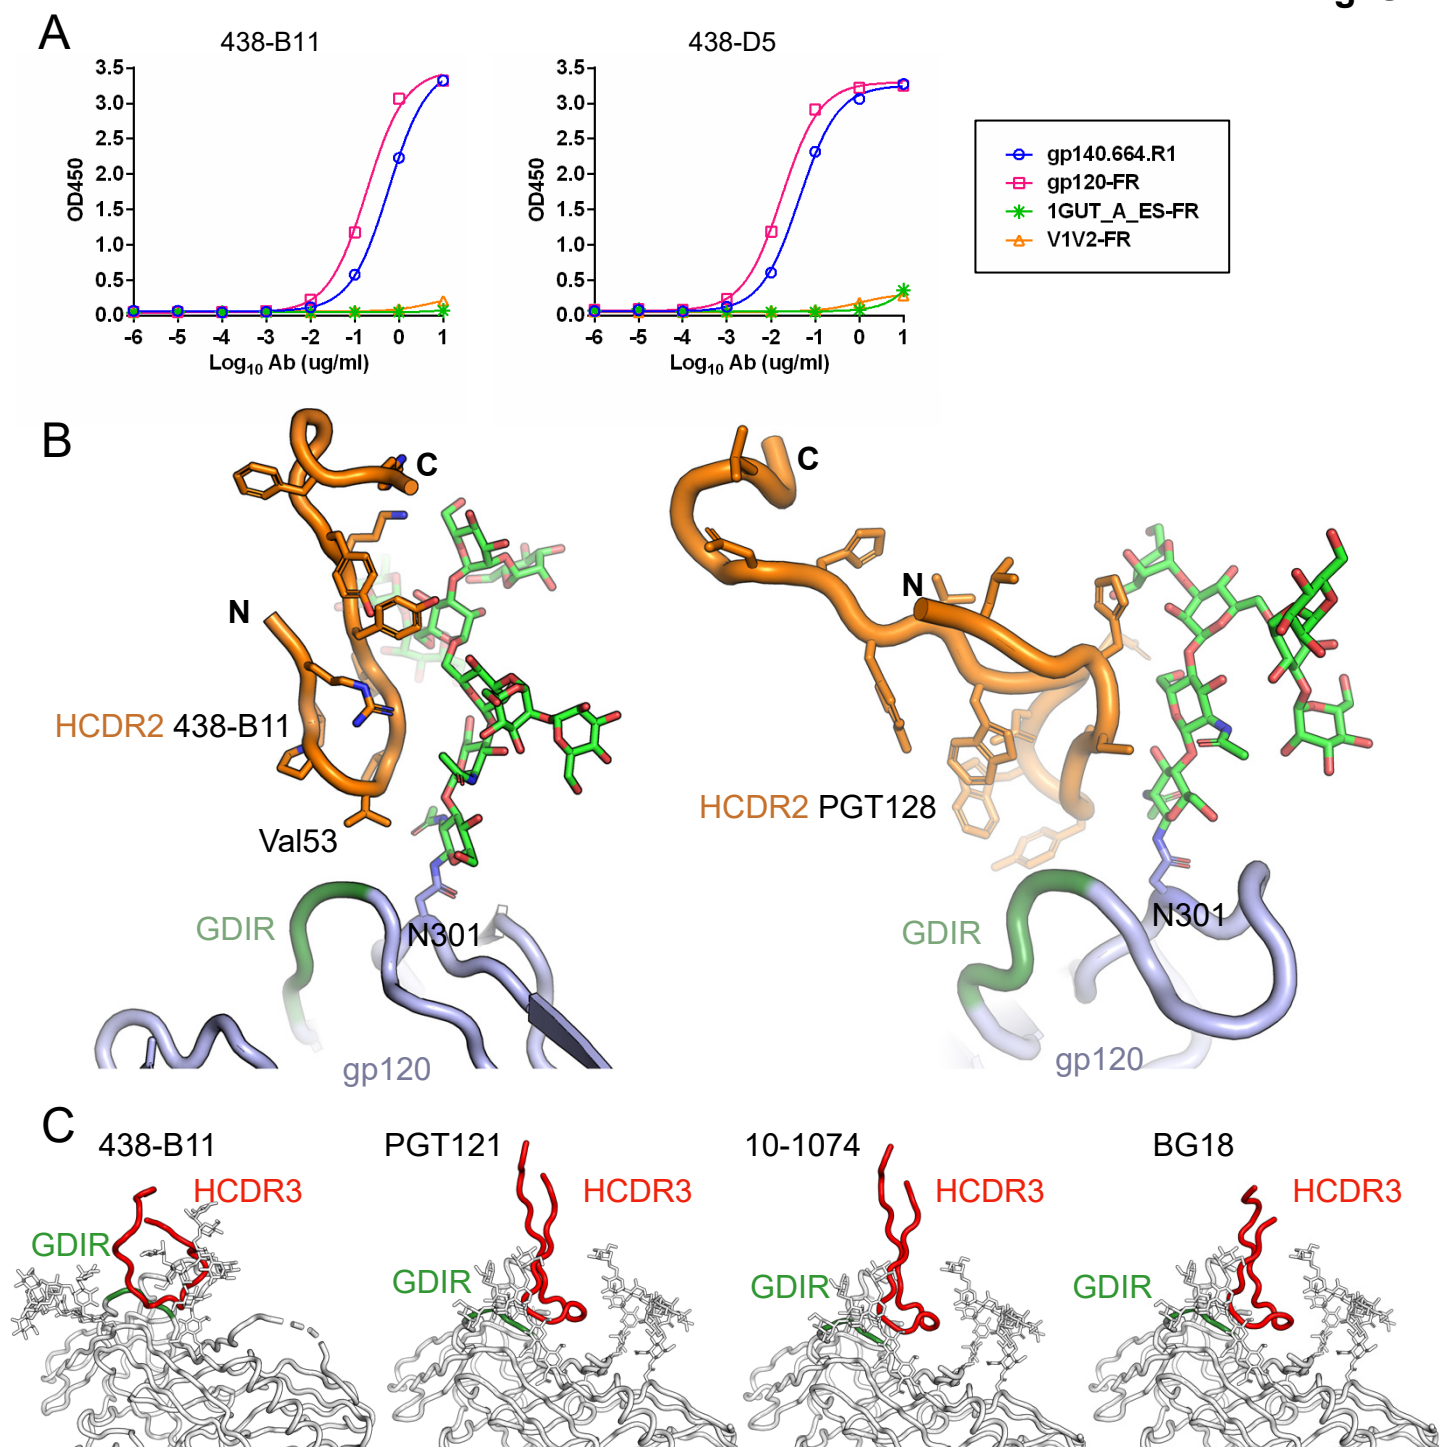

**fig. S1. Binding of monoclonal antibodies (mAbs) to the HIV-1 Env.** (A) 438-B11 and 438-D5 binding to the untagged HR1-redesigned trimer, BG505 gp140.664.R1, and four epitope antigens including a gp120-ferritin nanoparticle (gp120-FR), an N332 epitope-presenting ferritin nanoparticle (1GUT\_A\_ES-FR), and a ZM109 V1V2 ferritin nanoparticle (V1V2-FR). (B) Interaction of the apolar face of N-linked glycans at Asn301 of gp120 (blue) with HCDR2 (orange) of 438-B11 in complex with BG505 UFO.664 (left) and PGT128 with a modified gp120 (right, PDB ID: 3TYG). (C) HCDR3 (red) of different bNAbs buried in the N332 glycan pocket.

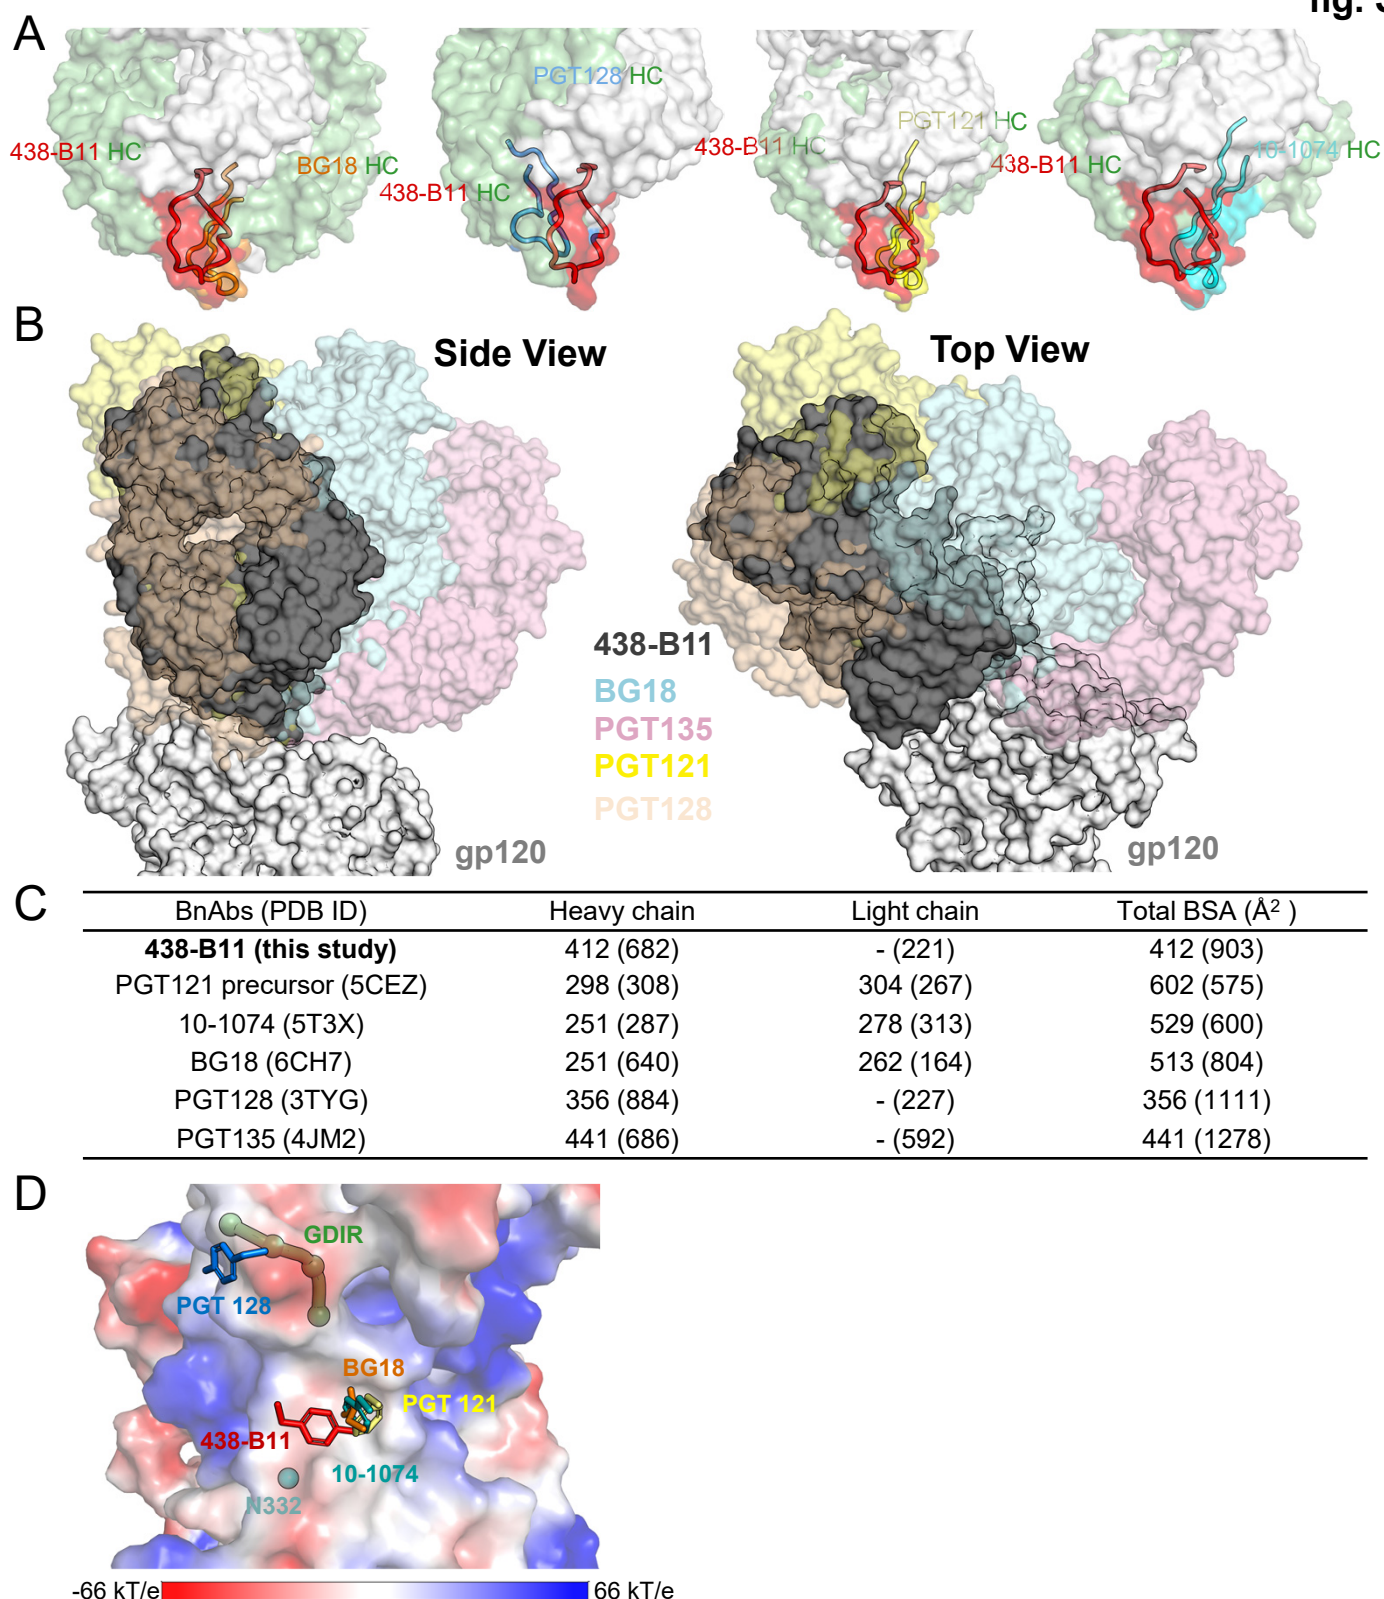

**fig. S2. Analysis of bNAbs HCDR3 orientation, angle of approach, and interaction hotspots on gp120. (A)** Superposition of the gp120 of Env-bound bNAbs (HC: green; and LC: grey) showing the relative HCDR3 orientation of 438-B11 (red), BG18 (orange), PGT128 (blue), PGT121 (yellow) and 10-1074 (cyan). **(B)** Side and top views of N332/V3 glycan-class bNAbs angle of approach to the gp120. **(C)** Buried surface area (BSA) in  $\text{\AA}^2$  contributed by bNAb heavy and light chain CDRs on the protein and glycan (shown in parentheses) components of the gp120 surface. **(D)** Residue at the tip of HCDR3 (PGT128: marine; 438-B11: red; PGT121 precursor: yellow; BG18: orange; and 10-174: cyan) are shown in sticks and interact with gp120 on the Env. The electrostatic surface of gp120 is shown with the bar below indicating negatively to positively charged molecular surfaces.

A

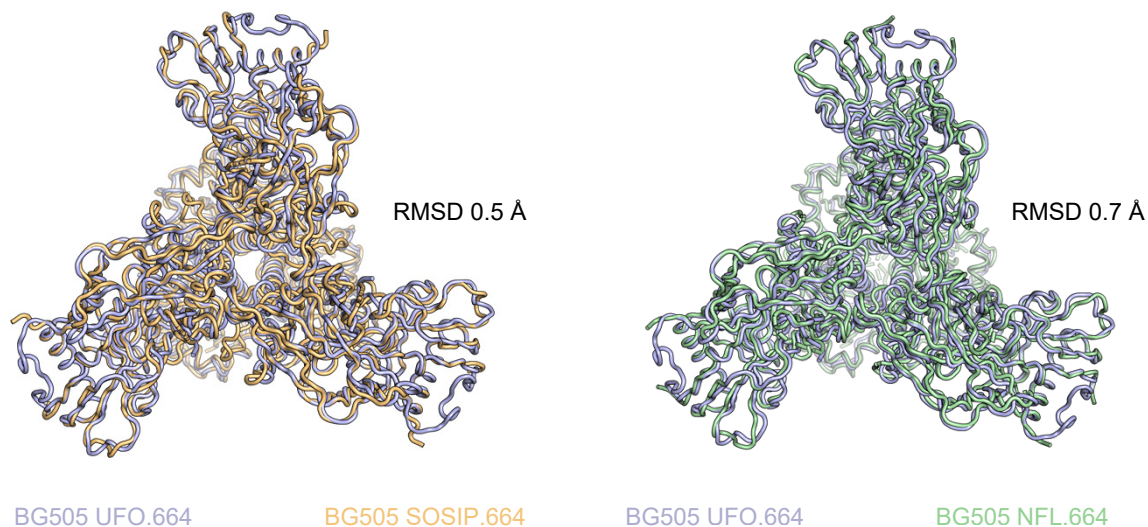

B

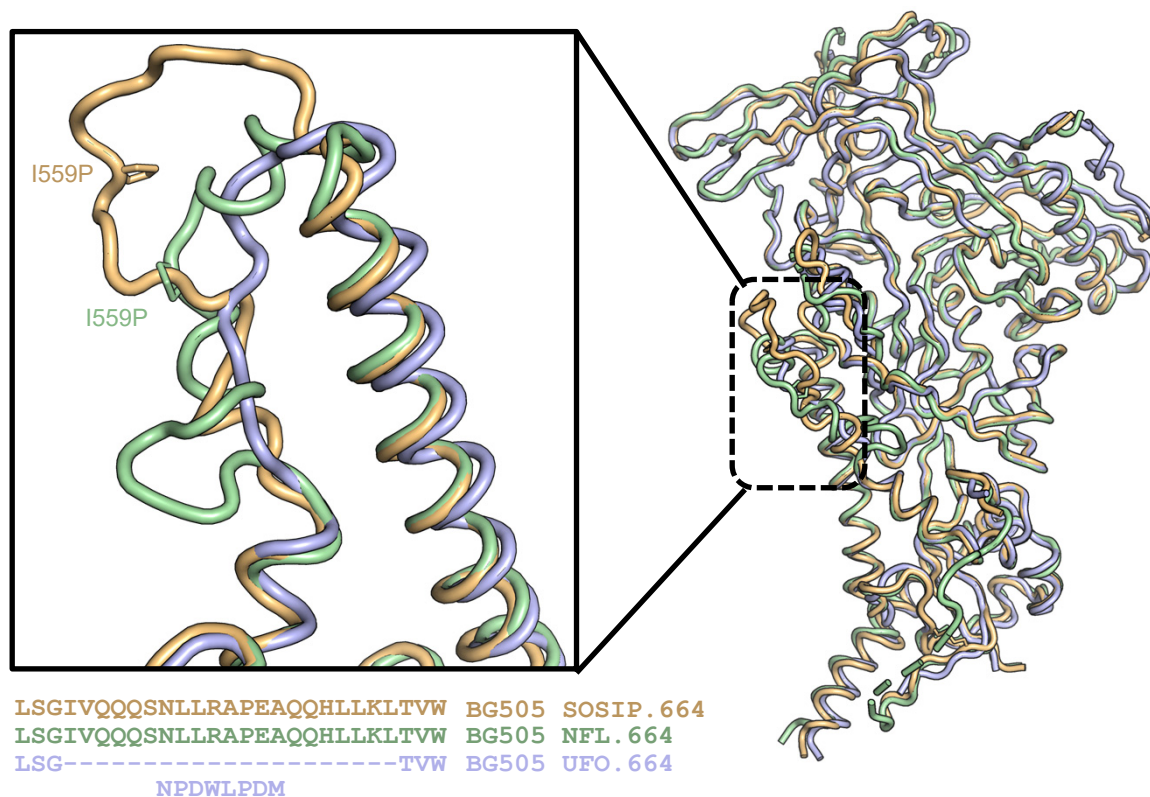

**fig. S3. BG505 trimers of SOSIP, NFL, and UFO designs share a highly similar architecture. (A)** Superimposition of cleaved BG505 SOSIP.664 (orange), uncleaved BG505 NFL.664 (green) and UFO.664 (blue). **(B)** Superimposition of SOSIP (orange), NFL (green) and UFO (blue) BG505 protomers. The inset on the left shows a close-up view of the superimposed heptad repeat 1 (HR1) N-terminal region (HR1<sub>N</sub>) from the three trimer designs. The I559P mutation is labeled for SOSIP and NFL. Sequence alignment of HR1<sub>N</sub> in three trimer designs is shown below the insert.

A

**B11 HC reversion (IGHV1-69\*01+IGHJ3\*01)**

438-B11 HC QVQLVQSGAEVRKPGSSVTISCKPVGFTFTNFIAHWVRQAPGQGLEWVGGRRVPVVGIIYKYGKKFH  
 438-B11 g1HC QVQLVQSGAEVKKPGSSVKVSKASGGTFSSYAISWVRQAPGQGLEWMMGGIIPIFGTANYAQQKFQ  
 \*\*\*\*\*:\*\*\*\*\*.:\*\*\*. \*\*\*\*:.:\*\*\* \*\*\*\*\*:\*\*\* :\*: \* :\*.:\*\*:

**HCDR3**

438-B11 HC DRLRLYEDDPMKTVFLELRSLTSDDTGVYYCTRWRGCGMCPYDTSSYYNDASDVWGPGTKVIVSA  
 438-B11 g1HC GRVTITADESTSTAYMELSSLRSEDVAVYYCTRWRGCGMCPYDTSSYYNDASDVWQQTMTVTVSS  
 .\*: : \*:. .\*:.:\*\* \*\* \*:.:\*\*\*\*\*:\*\*\*\*\*:\*\*\*\*\* \*\* \* \*\*:

**B11 KC reversion (IGKV3-20\*01+IGKJ3\*01)**

438-B11 KC EIVLTQSPVTLTSLSSGETGTLSCRASQNISSSWIAWYQRRGQVPRLLISAASARAAGIPDRFTG  
 438-B11 g1KC EIVLTQSPGTLTSLSPGERATLSCRASQSVSSSYLAWYQQKPGQAPRLLIYGASSRATGIPDRFSG  
 \*\*\*\*\* \*\*\*\*\*.\*.\*\*\*\*\*.:\*\*\*\*.:\*\*\*\*\*: \*\* .\*\*\*\*\* .\*:.:\*\*\*\*\*:\*

**KCDR3**

438-B11 KC RSGGTDFTLTITRLEPEDFGVYSCQYVGGSSFFTFGPGTQVDVK  
 438-B11 g1KC SSGGTDFTLTISRLEPEDFAVYYCQYVGGSSFFTFGPGTKVDIK  
 \*\*\*\*\*:\*\*\*\*\*.\* \*\*\*\*\*:\*\*\*\*\*:\*\*\*:\*

B

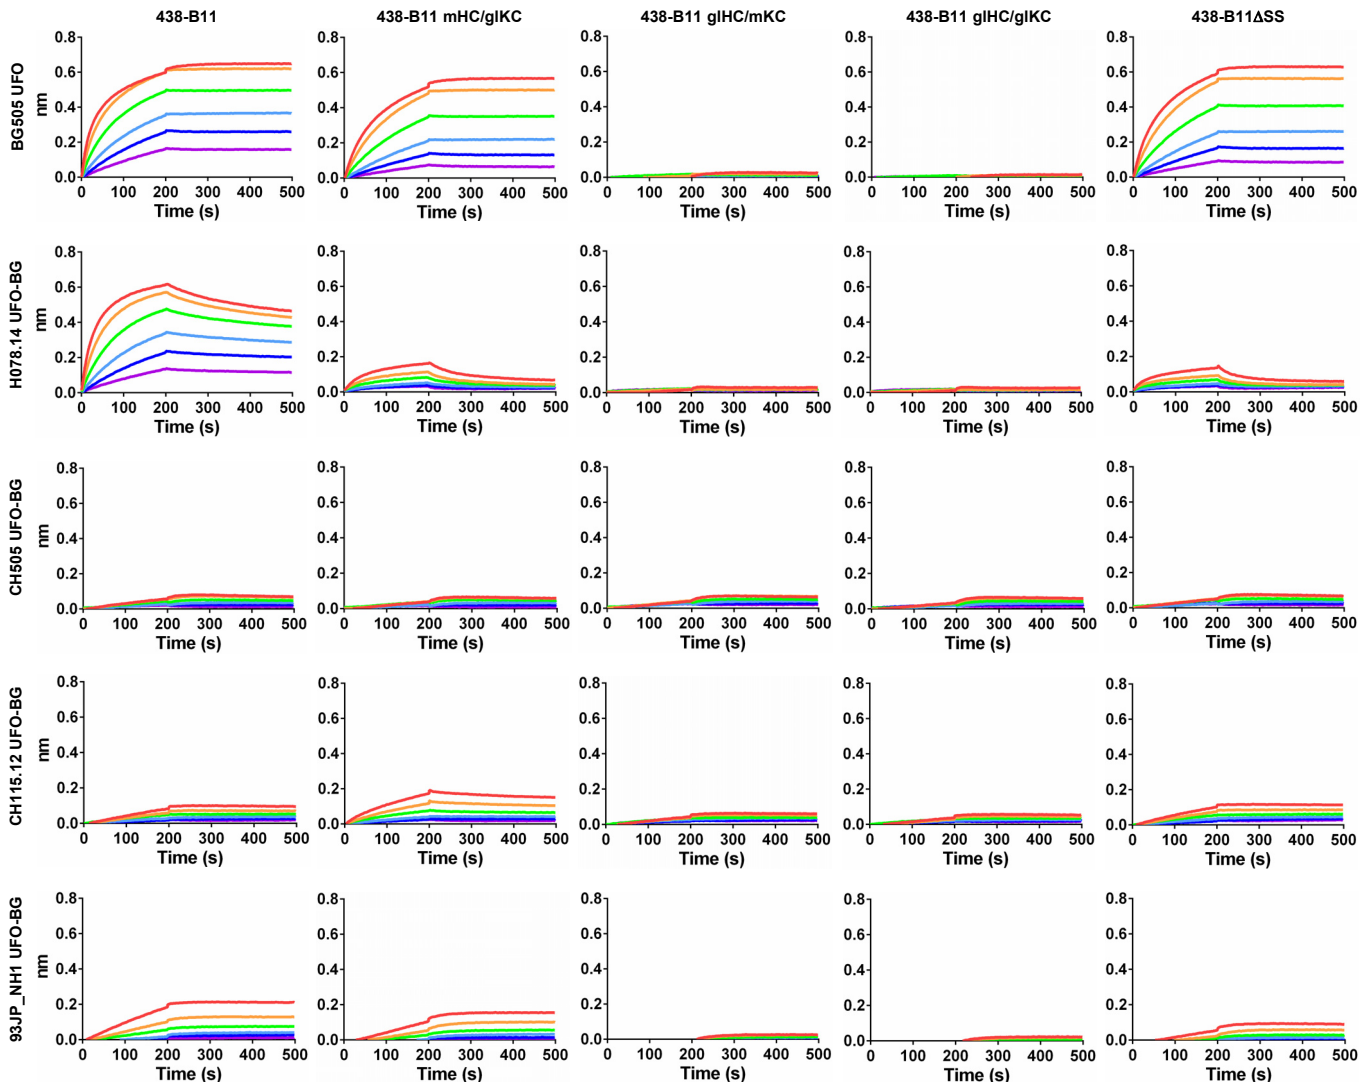



C

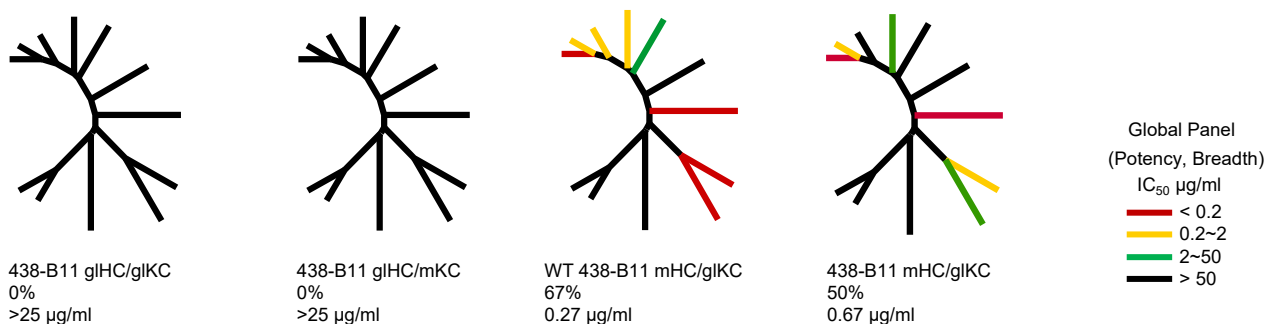

**fig. S4. Characterization of 438-B11 germline revertants and 438-B11 $\Delta$ SS mutant. (A)** Sequence alignment 438-B11 HC and KC revertants with their respective wildtype sequences. Putative germline genes and CDR3 regions (Kabat number) are labeled. **(B)** Binding of 438-B11 revertants and 438-B11 $\Delta$ SS mutant to UFO/UFO-BG trimers derived from five representative HIV-1 Envs, including clade-A BG505, clade-B H078.14, clade-C CH505, clade-BC CH115.12, and clade-AE 93JP\_NH1. BLI sensorgrams were obtained from an Octet RED96 instrument using a titration series of six trimer concentrations (200-6.25 nM by 2-fold dilution). **(C)** Neutralization breadth (%) and potency ( $\mu\text{g/ml}$ ) of germline revertants and mature 438-B11 against the global panel. The color-coding scheme is based on potency.

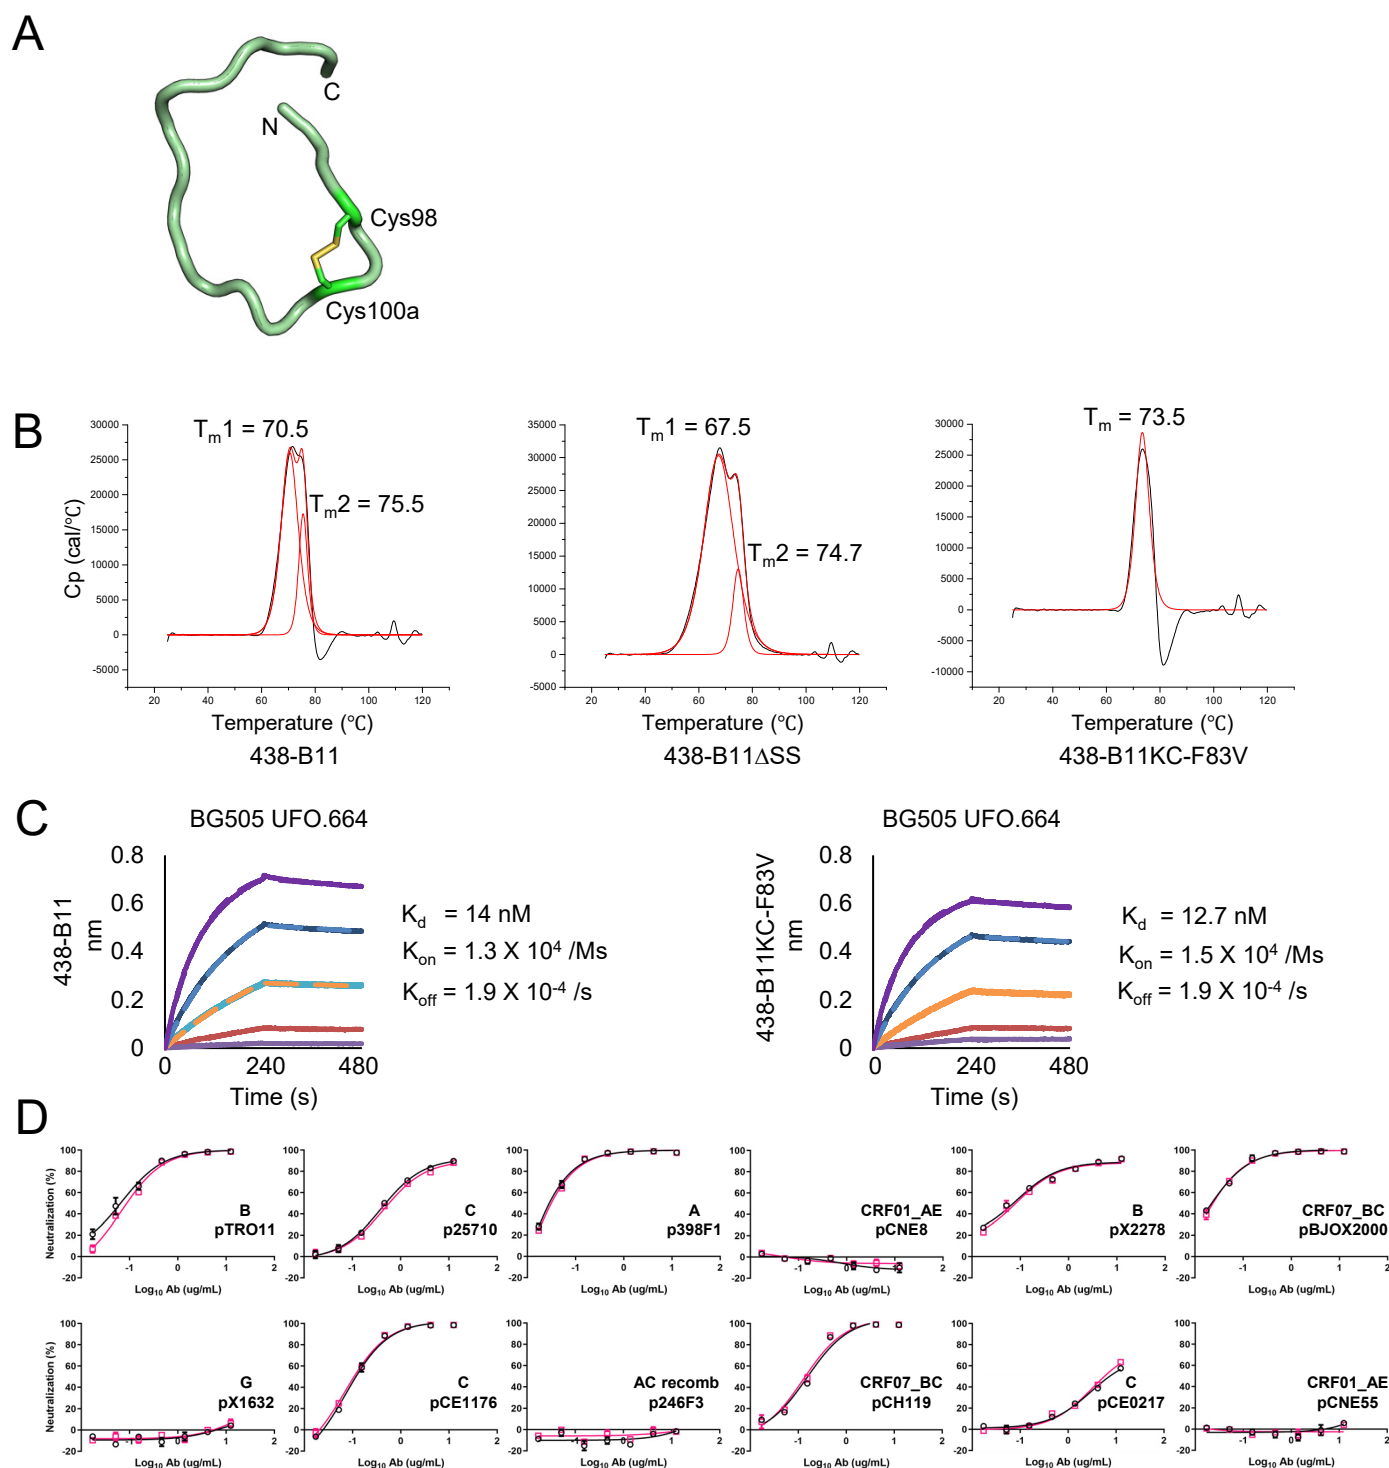

**fig. S5. Structure, binding and neutralization of 438-B11, 438-B11 $\Delta$ SS, and 438-B11KC-F83V.** (A) Structure of the U-shaped 438-B11 HCDR3 loop with the intra-HCDR3 disulfide bond (Cys98-Cys100a). (B) Differential scanning calorimetry (DSC) analysis of 438-B11, 438-B11 $\Delta$ SS, and 438-B11KC-F83V. Melting temperatures ( $T_M$ ) are labeled after the fitting. (C) Binding of 438-B11 and 438-B11KC-F83V for BG505 UFO.664 trimer. BLI sensorgrams were obtained from an Octet RED96 instrument using a titration series of five trimer concentrations (800-50 nM by 2-fold dilution). (D) Neutralization of global panel by 438-B11 (black) and 438-B11KC-F83V (pink).

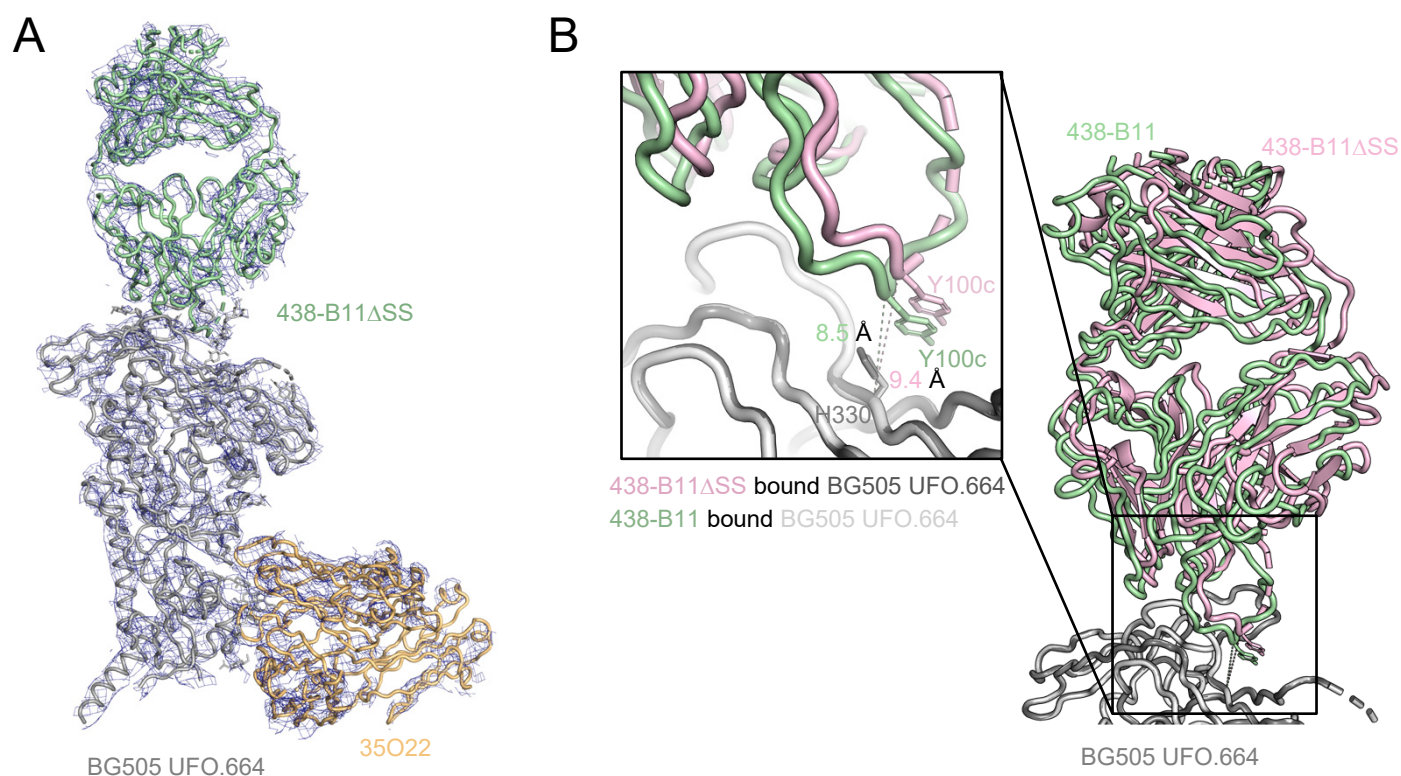

**fig. S6. Crystallographic analysis of the 438-B11 disulfide bond mutant. (A)** Crystal structure of the BG505 UFO.664 trimer (gp140:grey) trimer in complex with Fabs 438-B11 $\Delta$ SS (green) and 35O22 (orange) at 6.5 Å resolution. The side view of the Env protomer is shown here. **(B)** Superposition of the complex crystal structures of WT 438-B11 (green) and 438-B11 $\Delta$ SS (pink) bound to the BG505 UFO.664 trimer. The left inset shows an  $\sim 1$ Å upward movement of Fab 438-B11 $\Delta$ SS compared to WT 438-B11 on the gp120 protein surface. The distances are measured in Å between the C $\alpha$  atoms of gp120 His330 and 438-B11 HCDR3 Tyr100c.

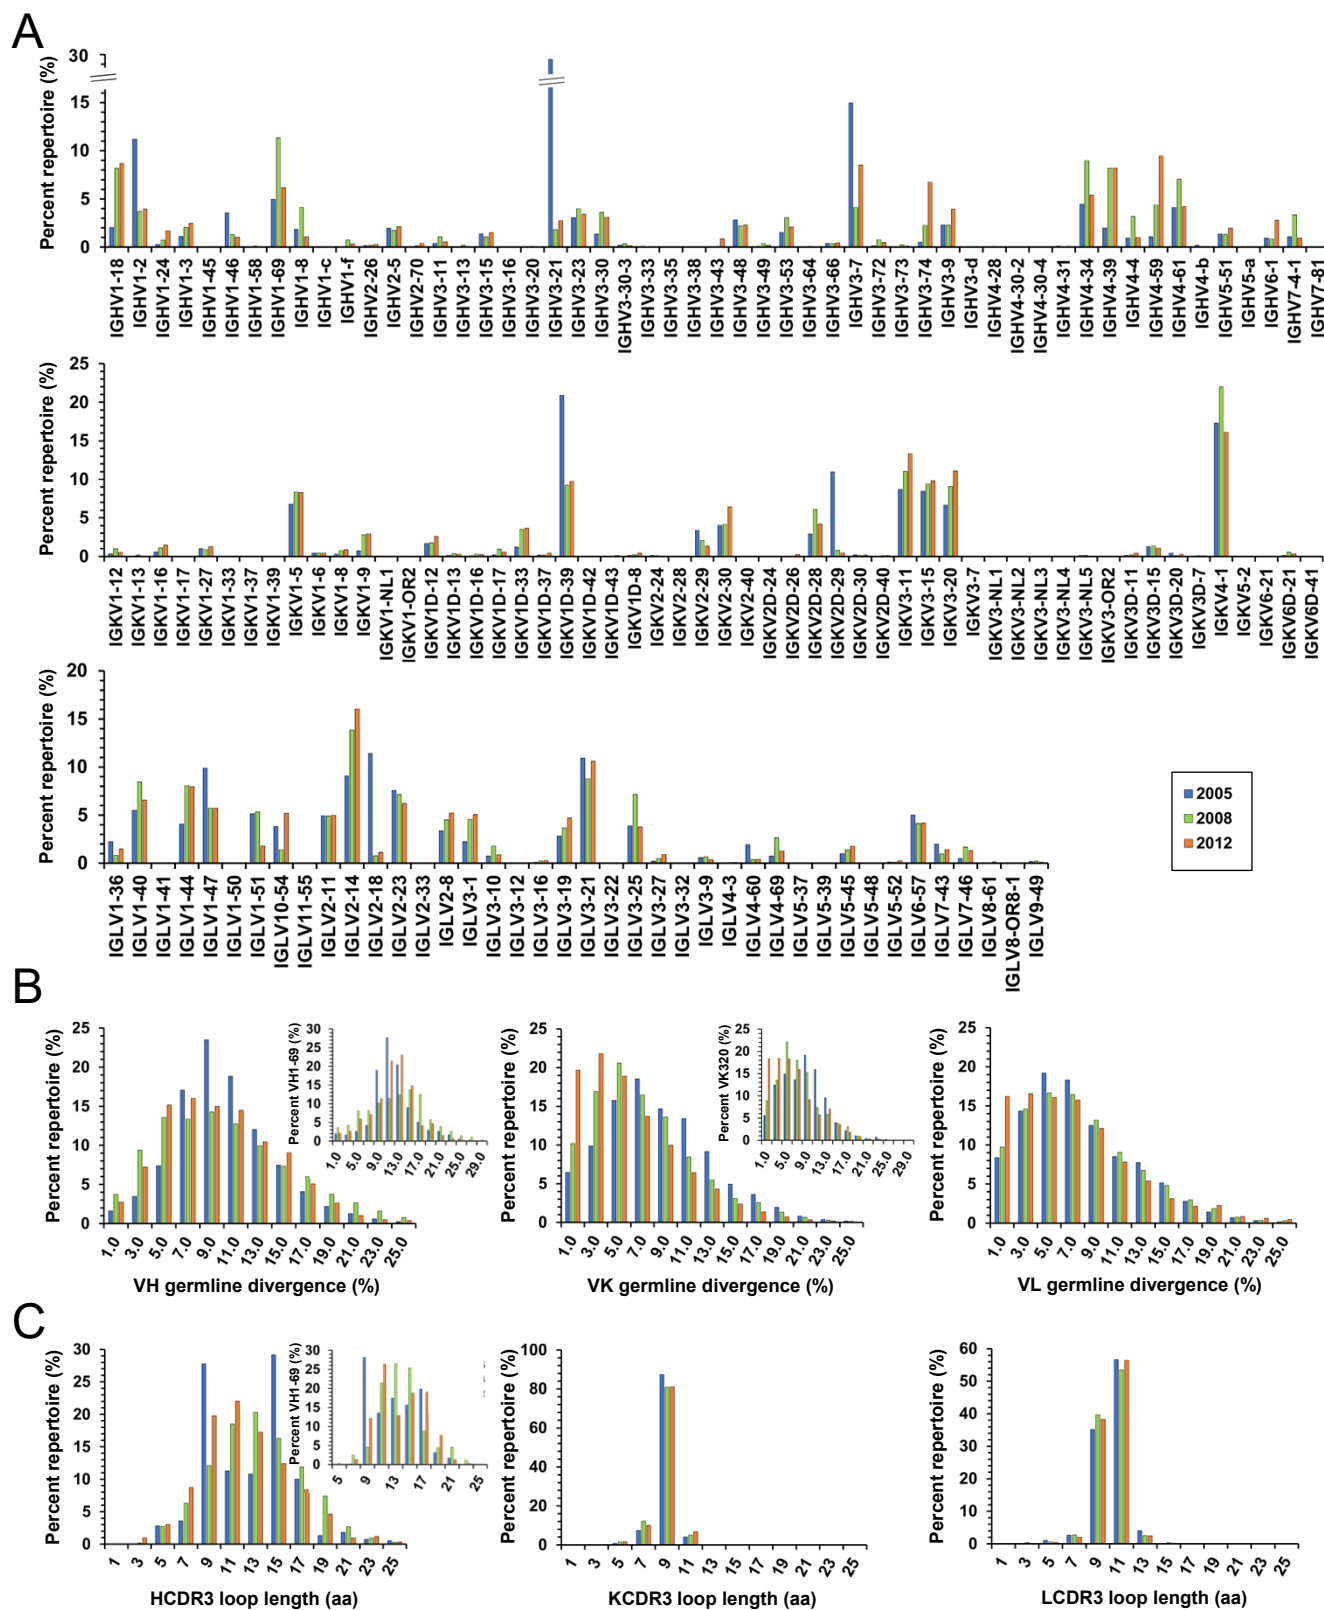

**fig. S7. B cell repertoire profiles of an HIV-1-infected Chinese donor (CBJC438) at three time points.** The distribution is plotted for **(A)** germline V gene usage for heavy and light ( $\kappa$  and  $\lambda$ ) chains, **(B)** germline gene divergence, or degree of SHM, and **(C)** CDR3 loop length (H: heavy chain; K:  $\kappa$  chain; L:  $\lambda$  chain). Color coding denotes the time point analyzed with 2005 shown in blue, 2008 in green, and 2012 in orange.

**A Selection of HC and KC sequences from the 2005 donor repertoire**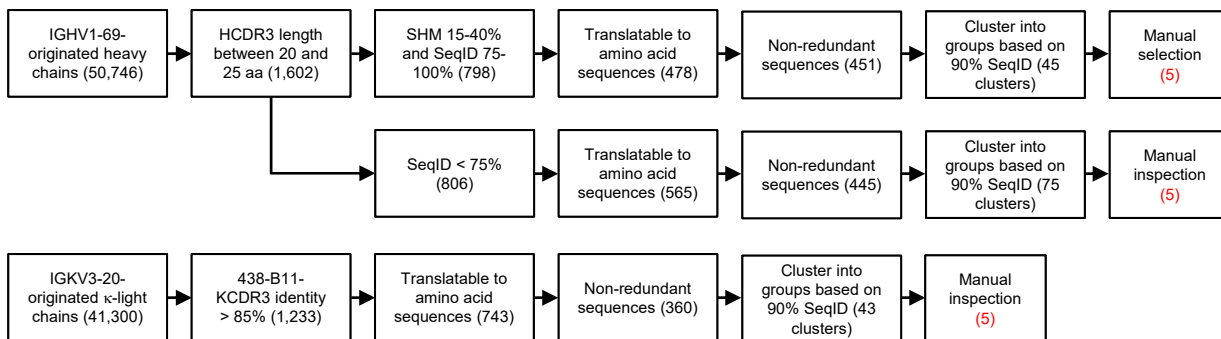**B Selection of HC and KC sequences from the 2008 donor repertoire**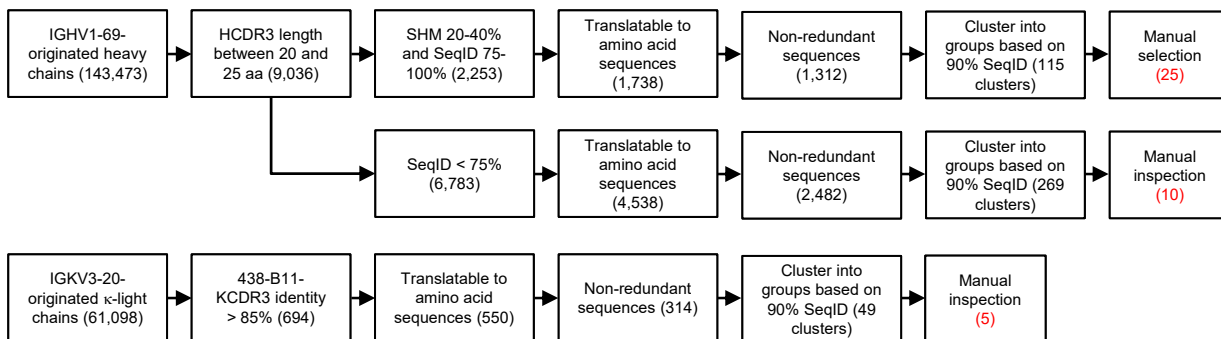**C Selection of HC and KC sequences from the 2012 donor repertoire**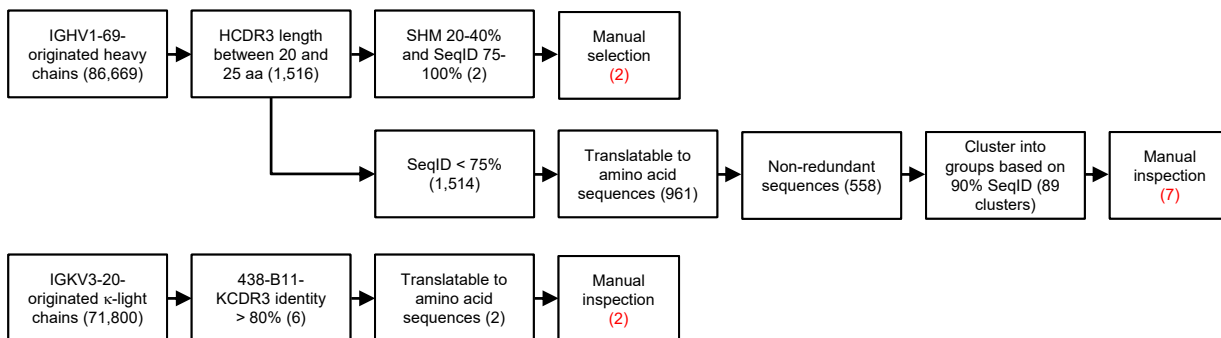

**fig. S8. Bioinformatics procedure used for selecting sequences from repertoire NGS data of an HIV-1-infected Chinese donor (CBJC438) for antibody synthesis and characterization. (A) 2005 repertoire. (B) 2008 repertoire. (C) 2012 repertoire. The number of remaining sequences at each step of the process is labeled.**
